# Supplementary material for: Crosstalk between copper homeostasis and cuproptosis reveals a lncRNA signature to prognosis prediction, immunotherapy personalization, and agent selection for patients with lung adenocarcinoma
Source: publisher site journal article supplement (doi:10.18632/aging.205281), 2023-11-26
Supplement: Supplementary file [file aging-v15i22-205281-supplementary-material-SD3.pdf]

**Supplementary Table 3. KEGG pathways identified by GSVA between two CoCu-DEG clusters. ID**

| <b>logFC</b>                                  | <b>AveExpr</b> |           | <b>t</b>  | <b>P.Value</b> | <b>adj.P.Val</b> | <b>B</b> |
|-----------------------------------------------|----------------|-----------|-----------|----------------|------------------|----------|
| KEGG_PROTEASOME                               | -0.514214      | -0.021759 | -15.13745 | 4.46E-43       | 8.29E-41         | 87.1137  |
| KEGG_DNA_REPLICATION                          | -0.482361      | -0.022075 | -12.71471 | 2.13E-32       | 1.99E-30         | 62.77938 |
| KEGG_PARKINSONS_DISEASE                       | -0.378733      | -0.019199 | -12.24435 | 1.99E-30       | 1.23E-28         | 58.29693 |
| KEGG_OXIDATIVE_PHOSPHORYLATION                | -0.382917      | -0.018117 | -11.78579 | 1.51E-28       | 7.02E-27         | 54.0164  |
| KEGG_CELL_CYCLE                               | -0.362096      | -0.018108 | -11.62397 | 6.81E-28       | 2.53E-26         | 52.52797 |
| KEGG_PENTOSE_PHOSPHATE_PATHWAY                | -0.315492      | -0.018257 | -11.55217 | 1.32E-27       | 4.10E-26         | 51.87143 |
| KEGG_HUNTINGTONS_DISEASE                      | -0.327929      | -0.017175 | -11.41412 | 4.72E-27       | 1.25E-25         | 50.61573 |
| KEGG_PYRIMIDINE_METABOLISM                    | -0.317194      | -0.019189 | -11.22323 | 2.70E-26       | 6.27E-25         | 48.89426 |
| KEGG_ALZHEIMERS_DISEASE                       | -0.309114      | -0.021003 | -11.20395 | 3.21E-26       | 6.64E-25         | 48.72142 |
| KEGG_PORPHYRIN_AND_CHLOROPHYLL_METABOLISM     | -0.253645      | -0.037944 | -11.10722 | 7.71E-26       | 1.43E-24         | 47.85664 |
| KEGG_GLUTATHIONE_METABOLISM                   | -0.268108      | -0.026108 | -10.93837 | 3.52E-25       | 5.95E-24         | 46.35824 |
| KEGG_MISMATCH_REPAIR                          | -0.403678      | -0.022138 | -10.88529 | 5.65E-25       | 8.76E-24         | 45.89016 |
| KEGG_GLYCOLYSIS_GLUONEOGENESIS                | -0.224116      | -0.02313  | -10.73678 | 2.11E-24       | 3.02E-23         | 44.58794 |
| KEGG_GLYOXYLATE_AND_DICARBOXYLATE_METABOLISM  | -0.313339      | -0.024252 | -10.1213  | 4.43E-22       | 5.89E-21         | 39.31444 |
| KEGG_CITRATE_CYCLE_TCA_CYCLE                  | -0.351093      | -0.021677 | -10.10571 | 5.06E-22       | 6.28E-21         | 39.18348 |
| KEGG_FOLATE_BIOSYNTHESIS                      | -0.296017      | -0.033599 | -10.05187 | 8.00E-22       | 9.30E-21         | 38.73245 |
| KEGG_PROTEIN_EXPORT                           | -0.371446      | -0.017624 | -9.932249 | 2.20E-21       | 2.40E-20         | 37.73595 |
| KEGG_RIBOSOME                                 | -0.440127      | -0.00877  | -9.91832  | 2.47E-21       | 2.55E-20         | 37.62045 |
| KEGG_CYSTEINE_AND_METHIONINE_METABOLISM       | -0.221775      | -0.031035 | -9.547269 | 5.38E-20       | 5.27E-19         | 34.58441 |
| KEGG_PURINE_METABOLISM                        | -0.214263      | -0.02317  | -9.482597 | 9.13E-20       | 8.49E-19         | 34.06345 |
| KEGG_BIOSYNTHESIS_OF_UNSATURATED_FATTY_ACIDS  | -0.262007      | -0.026117 | -9.46166  | 1.08E-19       | 9.59E-19         | 33.89533 |
| KEGG_LINOLEIC_ACID_METABOLISM                 | 0.226297       | -0.020138 | 9.438958  | 1.30E-19       | 1.10E-18         | 33.71333 |
| KEGG_PENTOSE_AND_GLUCURONATE_INTERCONVERSIONS | -0.250299      | -0.044244 | -9.409991 | 1.65E-19       | 1.33E-18         | 33.48155 |
| KEGG_TASTE_TRANSDUCTION                       | 0.148467       | -0.013728 | 9.355618  | 2.56E-19       | 1.98E-18         | 33.04784 |
| KEGG_RNA_POLYMERASE                           | -0.312704      | -0.020275 | -9.318326 | 3.46E-19       | 2.57E-18         | 32.75141 |
| KEGG_BASE_EXCISION_REPAIR                     | -0.306597      | -0.014459 | -9.254452 | 5.78E-19       | 4.14E-18         | 32.24562 |

|                                                      |           |           |           |          |          |          |
|------------------------------------------------------|-----------|-----------|-----------|----------|----------|----------|
| KEGG_ALANINE_ASPARTATE_AND_GLUTAMATE_M<br>ETABOLISM  | -0.192363 | -0.030697 | -9.05376  | 2.86E-18 | 1.97E-17 | 30.67269 |
| KEGG_OOCYTE_MEIOSIS                                  | -0.229943 | -0.023443 | -9.048804 | 2.97E-18 | 1.97E-17 | 30.63416 |
| KEGG_NUCLEOTIDE_EXCISION_REPAIR                      | -0.305548 | -0.014825 | -8.723936 | 3.74E-17 | 2.38E-16 | 28.14226 |
| KEGG_GALACTOSE_METABOLISM                            | -0.232092 | -0.020419 | -8.720505 | 3.84E-17 | 2.38E-16 | 28.11631 |
| KEGG_RIBOFLAVIN_METABOLISM                           | -0.233498 | -0.033088 | -8.710556 | 4.15E-17 | 2.49E-16 | 28.04107 |
| KEGG_ONE_CARBON_POOL_BY_FOLATE                       | -0.268353 | -0.024557 | -8.686701 | 4.98E-17 | 2.90E-16 | 27.86094 |
| KEGG_HOMOLOGOUS_RECOMBINATION                        | -0.31657  | -0.025433 | -8.667472 | 5.78E-17 | 3.26E-16 | 27.71601 |
| KEGG_P53_SIGNALING_PATHWAY                           | -0.208853 | -0.022425 | -8.521662 | 1.75E-16 | 9.59E-16 | 26.62483 |
| KEGG_PATHOGENIC_ESCHERICHIA_COLI_INFECTI<br>ON       | -0.233907 | -0.018415 | -8.496289 | 2.12E-16 | 1.13E-15 | 26.43637 |
| KEGG_ARGININE_AND_PROLINE_METABOLISM                 | -0.191944 | -0.024934 | -8.481079 | 2.38E-16 | 1.23E-15 | 26.32359 |
| KEGG_PYRUVATE_METABOLISM                             | -0.219296 | -0.024872 | -8.473244 | 2.53E-16 | 1.27E-15 | 26.26556 |
| KEGG_CARDIAC_MUSCLE_CONTRACTION                      | -0.164164 | -0.027522 | -8.34021  | 6.85E-16 | 3.35E-15 | 25.2864  |
| KEGG_REGULATION_OF_AUTOPHAGY                         | -0.170373 | 0.02176   | -8.335925 | 7.07E-16 | 3.37E-15 | 25.25506 |
| KEGG_BASAL_TRANSCRIPTION_FACTORS                     | -0.266482 | -0.022653 | -8.14449  | 2.90E-15 | 1.35E-14 | 23.86735 |
| KEGG_TERPENOID_BACKBONE_BIOSYNTHESIS                 | -0.281833 | -0.025094 | -8.133532 | 3.15E-15 | 1.43E-14 | 23.78867 |
| KEGG_AMINOACYL_TRNA_BIOSYNTHESIS                     | -0.295927 | -0.013441 | -7.71481  | 6.34E-14 | 2.81E-13 | 20.84393 |
| KEGG_AMINO_SUGAR_AND_NUCLEOTIDE_SUGAR_<br>METABOLISM | -0.237755 | -0.013869 | -7.668198 | 8.78E-14 | 3.80E-13 | 20.5237  |
| KEGG_ABC_TRANSPORTERS                                | 0.164451  | -0.017364 | 7.378422  | 6.47E-13 | 2.74E-12 | 18.56771 |
| KEGG_SPLICEOSOME                                     | -0.275831 | -0.005334 | -7.252119 | 1.52E-12 | 6.27E-12 | 17.73419 |
| KEGG_FRUCTOSE_AND_MANNOSE_METABOLISM                 | -0.201241 | -0.021361 | -7.220111 | 1.88E-12 | 7.60E-12 | 17.52481 |
| KEGG_RNA_DEGRADATION                                 | -0.248671 | -0.017427 | -7.069034 | 5.11E-12 | 2.02E-11 | 16.54678 |
| KEGG_N_GLYCAN_BIOSYNTHESIS                           | -0.231612 | -0.018882 | -7.028059 | 6.69E-12 | 2.59E-11 | 16.28445 |
| KEGG_ALPHA_LINOLENIC_ACID_METABOLISM                 | 0.166292  | -0.013956 | 6.916643  | 1.38E-11 | 5.23E-11 | 15.5775  |
| KEGG_STARCH_AND_SUCROSE_METABOLISM                   | -0.136802 | -0.033695 | -6.840882 | 2.24E-11 | 8.35E-11 | 15.10213 |
| KEGG_DRUG_METABOLISM_OTHER_ENZYMES                   | -0.135286 | -0.037578 | -6.764966 | 3.64E-11 | 1.33E-10 | 14.63017 |
| KEGG_PHENYLALANINE_METABOLISM                        | -0.171811 | -0.031179 | -6.645403 | 7.73E-11 | 2.76E-10 | 13.89581 |
| KEGG_ASCORBATE_AND_ALDARATE_METABOLISM               | -0.193024 | -0.037442 | -6.526082 | 1.62E-10 | 5.69E-10 | 13.17391 |
| KEGG_BLADDER_CANCER                                  | -0.165529 | -0.019479 | -6.375544 | 4.06E-10 | 1.40E-09 | 12.27899 |
| KEGG_GLYCOSPHINGOLIPID_BIOSYNTHESIS_LACT             | -0.14748  | -0.029269 | -6.329583 | 5.36E-10 | 1.81E-09 | 12.0093  |

## O\_AND\_NEOLACTO\_SERIES

|                                                                 |           |           |           |          |          |          |
|-----------------------------------------------------------------|-----------|-----------|-----------|----------|----------|----------|
| KEGG_PROGESTERONE_MEDIATED_OOCYTE_MATURATION                    | -0.164358 | -0.021829 | -6.27533  | 7.42E-10 | 2.46E-09 | 11.69311 |
| KEGG_SYSTEMIC_LUPUS_ERYTHEMATOSUS                               | -0.142576 | -0.020037 | -6.236952 | 9.32E-10 | 3.04E-09 | 11.47084 |
| KEGG_VIBRIO_CHOLERAЕ_INFECTION                                  | -0.168031 | -0.019696 | -6.23434  | 9.47E-10 | 3.04E-09 | 11.45576 |
| KEGG_VALINE_LEUCINE_AND_ISOLEUCINE_BIOSYNTHESIS                 | -0.227949 | -0.023389 | -6.160682 | 1.46E-09 | 4.61E-09 | 11.03261 |
| KEGG_NICOTINATE_AND_NICOTINAMIDE_METABOLISM                     | -0.141007 | -0.032357 | -6.129131 | 1.76E-09 | 5.46E-09 | 10.85268 |
| KEGG_STEROID_BIOSYNTHESIS                                       | -0.197347 | -0.018048 | -5.882072 | 7.30E-09 | 2.23E-08 | 9.471481 |
| KEGG_UBIQUITIN_MEDIATED_PROTEOLYSIS                             | -0.191416 | -0.015605 | -5.758078 | 1.46E-08 | 4.39E-08 | 8.796979 |
| KEGG_GLYCINE_SERINE_AND_THREONINE_METABOLISM                    | -0.122122 | -0.031326 | -5.648679 | 2.68E-08 | 7.91E-08 | 8.212364 |
| KEGG_TAURINE_AND_HYPOTAURINE_METABOLISM                         | 0.14871   | -0.019764 | 5.423848  | 8.99E-08 | 2.61E-07 | 7.042064 |
| KEGG_SELENOAMINO_ACID_METABOLISM                                | -0.158409 | -0.025363 | -5.356174 | 1.28E-07 | 3.67E-07 | 6.698091 |
| KEGG_PEROXISOME                                                 | -0.15393  | -0.015619 | -5.250336 | 2.23E-07 | 6.27E-07 | 6.167888 |
| KEGG_CYTOSOLIC_DNA_SENSING_PATHWAY                              | -0.12486  | -0.003506 | -5.173037 | 3.31E-07 | 9.18E-07 | 5.786655 |
| KEGG_AMYOTROPHIC_LATERAL_SCLEROSIS_ALS                          | -0.122543 | -0.022299 | -5.142284 | 3.86E-07 | 1.06E-06 | 5.636399 |
| KEGG_GLYCOSAMINOGLYCAN_BIOSYNTHESIS_KERATAN_SULFATE             | -0.153003 | -0.016921 | -5.089379 | 5.05E-07 | 1.36E-06 | 5.379803 |
| KEGG_NON_HOMOLOGOUS_END_JOINING                                 | -0.176978 | -0.023987 | -4.880825 | 1.41E-06 | 3.75E-06 | 4.391728 |
| KEGG_BUTANOATE_METABOLISM                                       | -0.12384  | -0.027218 | -4.812016 | 1.97E-06 | 5.15E-06 | 4.073984 |
| KEGG_ASTHMA                                                     | 0.183162  | 0.010845  | 4.697147  | 3.39E-06 | 8.76E-06 | 3.552743 |
| KEGG_LYSINE_DEGRADATION                                         | -0.143082 | -0.022263 | -4.528518 | 7.39E-06 | 1.88E-05 | 2.808519 |
| KEGG_LIMONENE_AND_PINENE_DEGRADATION                            | -0.158602 | -0.027811 | -4.435954 | 1.12E-05 | 2.82E-05 | 2.410673 |
| KEGG_EPITHELIAL_CELL_SIGNALING_IN_HELICOBACTER_PYLORI_INFECTION | -0.122232 | -0.017631 | -4.363857 | 1.55E-05 | 3.83E-05 | 2.106069 |
| KEGG_PANCREATIC_CANCER                                          | -0.130526 | -0.018202 | -4.340245 | 1.71E-05 | 4.20E-05 | 2.007313 |
| KEGG_HEDGEHOG_SIGNALING_PATHWAY                                 | 0.097324  | -0.015526 | 4.203503  | 3.10E-05 | 7.49E-05 | 1.445228 |
| KEGG_ARACHIDONIC_ACID_METABOLISM                                | 0.091883  | -0.013796 | 4.192797  | 3.24E-05 | 7.74E-05 | 1.401926 |
| KEGG_BASAL_CELL_CARCINOMA                                       | 0.100029  | -0.012722 | 4.180701  | 3.42E-05 | 8.04E-05 | 1.35313  |
| KEGG_PROPANOATE_METABOLISM                                      | -0.134744 | -0.022072 | -4.172841 | 3.53E-05 | 8.21E-05 | 1.321494 |
| KEGG_RENAL_CELL_CARCINOMA                                       | -0.123927 | -0.017196 | -4.037009 | 6.24E-05 | 0.000143 | 0.783544 |

|                                                               |           |           |           |          |          |           |
|---------------------------------------------------------------|-----------|-----------|-----------|----------|----------|-----------|
| KEGG_SPHINGOLIPID_METABOLISM                                  | -0.111109 | -0.023932 | -4.007061 | 7.06E-05 | 0.00016  | 0.667184  |
| KEGG_BETA_ALANINE_METABOLISM                                  | -0.10211  | -0.029212 | -3.991937 | 7.51E-05 | 0.000168 | 0.608732  |
| KEGG_PRION_DISEASES                                           | -0.105652 | -0.015367 | -3.965328 | 8.37E-05 | 0.000185 | 0.506394  |
| KEGG_CALCIIUM_SIGNALING_PATHWAY                               | 0.080791  | -0.014154 | 3.875831  | 0.00012  | 0.000263 | 0.166915  |
| KEGG_GLYCOSPHINGOLIPID_BIOSYNTHESIS_GLOB<br>O_SERIES          | -0.117674 | -0.017605 | -3.853944 | 0.000131 | 0.000283 | 0.085006  |
| KEGG_VALINE_LEUCINE_AND_ISOLEUCINE_DEGRA<br>DATION            | -0.126087 | -0.015296 | -3.814449 | 0.000153 | 0.000327 | -0.061689 |
| KEGG_THYROID_CANCER                                           | -0.111451 | -0.019644 | -3.742591 | 0.000203 | 0.000428 | -0.32493  |
| KEGG_VASCULAR_SMOOTH_MUSCLE_CONTRACTI<br>ON                   | 0.088778  | -0.014647 | 3.626011  | 0.000317 | 0.000661 | -0.741911 |
| KEGG_PROSTATE_CANCER                                          | -0.101859 | -0.015892 | -3.607693 | 0.000339 | 0.000701 | -0.806292 |
| KEGG_TRYPTOPHAN_METABOLISM                                    | -0.080124 | -0.024739 | -3.559881 | 0.000405 | 0.00082  | -0.972871 |
| KEGG_MELANOMA                                                 | -0.081002 | -0.02152  | -3.559833 | 0.000406 | 0.00082  | -0.973038 |
| KEGG_DILATED_CARDIOMYOPATHY                                   | 0.089625  | -0.01128  | 3.505     | 0.000496 | 0.000993 | -1.161469 |
| KEGG_REGULATION_OF_ACTIN_CYTOSKELETON                         | -0.089184 | -0.014289 | -3.494386 | 0.000516 | 0.001021 | -1.197622 |
| KEGG_GNRH_SIGNALING_PATHWAY                                   | 0.080396  | -0.01471  | 3.474112  | 0.000556 | 0.001088 | -1.266389 |
| KEGG_GLYCEROLIPID_METABOLISM                                  | -0.073167 | -0.02185  | -3.360201 | 0.000837 | 0.001621 | -1.645651 |
| KEGG_CIRCADIAN_RHYTHM_MAMMAL                                  | 0.109512  | -0.014208 | 3.317002  | 0.000974 | 0.001868 | -1.786316 |
| KEGG_GLYCOSYLPHOSPHATIDYLINOSITOL_GPI_AN<br>CHOR_BIOSYNTHESIS | -0.117702 | -0.020031 | -3.284277 | 0.001092 | 0.002073 | -1.891716 |
| KEGG_SMALL_CELL_LUNG_CANCER                                   | -0.092642 | -0.01771  | -3.268762 | 0.001152 | 0.002165 | -1.941335 |
| KEGG_SNARE_INTERACTIONS_IN_VESICULAR_TRA<br>NSPORT            | -0.110064 | -0.015749 | -3.263336 | 0.001174 | 0.002184 | -1.958637 |
| KEGG_FC_EPSILON_RI_SIGNALING_PATHWAY                          | 0.080309  | -0.012191 | 3.137232  | 0.001803 | 0.003321 | -2.352928 |
| KEGG_MATURITY_ONSET_DIABETES_OF_THE_YOU<br>NG                 | -0.080496 | -0.027066 | -3.039014 | 0.002494 | 0.004548 | -2.649669 |
| KEGG_PANTOTHENATE_AND_COA_BIOSYNTHESIS                        | -0.081088 | -0.023307 | -3.02088  | 0.002646 | 0.004778 | -2.70346  |
| KEGG_CHRONIC_MYELOID_LEUKEMIA                                 | -0.094547 | -0.013148 | -2.991591 | 0.002908 | 0.005202 | -2.789684 |
| KEGG_PHOSPHATIDYLINOSITOL_SIGNALING_SYST<br>EM                | 0.08179   | -0.015796 | 2.987537  | 0.002947 | 0.00522  | -2.801555 |
| KEGG_INTESTINAL_IMMUNE_NETWORK_FOR_IGA_<br>PRODUCTION         | 0.111844  | 0.005086  | 2.919113  | 0.003664 | 0.00643  | -2.999566 |

|                                               |           |           |           |          |          |           |
|-----------------------------------------------|-----------|-----------|-----------|----------|----------|-----------|
| KEGG_ANTIGEN_PROCESSING_AND_PRESENTATION      | -0.087654 | -0.003732 | -2.87698  | 0.004182 | 0.007269 | -3.119289 |
| KEGG_GAP_JUNCTION                             | -0.067521 | -0.015589 | -2.858762 | 0.004426 | 0.007622 | -3.170531 |
| KEGG_PATHWAYS_IN_CANCER                       | -0.06903  | -0.01402  | -2.822529 | 0.004949 | 0.008445 | -3.271512 |
| KEGG_INSULIN_SIGNALING_PATHWAY                | -0.073665 | -0.019116 | -2.798877 | 0.005321 | 0.008997 | -3.336757 |
| KEGG_ADHERENS_JUNCTION                        | -0.084387 | -0.015501 | -2.68394  | 0.007511 | 0.012585 | -3.64622  |
| KEGG_STEROID_HORMONE_BIOSYNTHESIS             | -0.061449 | -0.025548 | -2.666908 | 0.007896 | 0.013114 | -3.691007 |
| KEGG_MTOR_SIGNALING_PATHWAY                   | -0.076537 | -0.02197  | -2.639115 | 0.008564 | 0.014097 | -3.763492 |
| KEGG_HEMATOPOIETIC_CELL_LINEAGE               | 0.083917  | 0.006532  | 2.616304  | 0.00915  | 0.014929 | -3.822432 |
| KEGG_NEUROACTIVE_LIGAND_RECEPTOR_INTERACTION  | 0.050318  | -0.017116 | 2.588367  | 0.009916 | 0.016038 | -3.893938 |
| KEGG_RIG_I_LIKE_RECEPTOR_SIGNALING_PATHWAY    | -0.064953 | -0.008088 | -2.577236 | 0.010237 | 0.016414 | -3.92222  |
| KEGG_ALLOGRAFT_REJECTION                      | 0.106854  | 0.008692  | 2.467379  | 0.013935 | 0.022153 | -4.194974 |
| KEGG_HYPERTROPHIC_CARDIOMYOPATHY_HCM          | 0.059348  | -0.01573  | 2.413485  | 0.016149 | 0.025456 | -4.32454  |
| KEGG_VASOPRESSIN_REGULATED_WATER_REABSORPTION | -0.072914 | -0.0193   | -2.349519 | 0.019175 | 0.029971 | -4.47469  |
| KEGG_ENDOCYTOSIS                              | -0.06806  | -0.013258 | -2.329077 | 0.020242 | 0.031374 | -4.521844 |
| KEGG_TIGHT_JUNCTION                           | -0.054888 | -0.019904 | -2.307966 | 0.021397 | 0.032891 | -4.570113 |
| KEGG_TOLL_LIKE_RECEPTOR_SIGNALING_PATHWAY     | -0.064222 | -0.00816  | -2.283666 | 0.022798 | 0.034758 | -4.625146 |
| KEGG_TYROSINE_METABOLISM                      | -0.051171 | -0.025545 | -2.27135  | 0.023538 | 0.035594 | -4.65282  |
| KEGG_ETHER_LIPID_METABOLISM                   | 0.050962  | -0.019731 | 2.20885   | 0.027625 | 0.041438 | -4.790992 |
| KEGG_COLORECTAL_CANCER                        | -0.067008 | -0.016633 | -2.177044 | 0.029931 | 0.044538 | -4.859854 |
| KEGG_CELL_ADHESION_MOLECULES_CAMS             | 0.065402  | 3.14E-05  | 2.162964  | 0.031004 | 0.045768 | -4.890027 |
| KEGG_GLIOMA                                   | -0.058378 | -0.019677 | -2.154866 | 0.031636 | 0.046333 | -4.907292 |
| KEGG_ADIPOCYTOKINE_SIGNALING_PATHWAY          | -0.050811 | -0.023257 | -2.098514 | 0.036347 | 0.052817 | -5.025679 |
| KEGG_AUTOIMMUNE_THYROID_DISEASE               | 0.071209  | 0.02001   | 2.06734   | 0.039202 | 0.056524 | -5.089846 |
| KEGG_NOD_LIKE_RECEPTOR_SIGNALING_PATHWAY      | -0.062573 | -0.012028 | -2.064077 | 0.039511 | 0.056532 | -5.096508 |
| KEGG_OLFACTORY_TRANSDUCTION                   | -0.044476 | 0.09938   | -2.055628 | 0.040323 | 0.057252 | -5.113709 |
| KEGG_NOTCH_SIGNALING_PATHWAY                  | -0.060099 | -0.009001 | -1.963297 | 0.05015  | 0.070666 | -5.297163 |
| KEGG_JAK_STAT_SIGNALING_PATHWAY               | 0.045238  | -0.009658 | 1.93845   | 0.053115 | 0.074282 | -5.345114 |

|                                                           |           |           |           |          |          |           |
|-----------------------------------------------------------|-----------|-----------|-----------|----------|----------|-----------|
| KEGG_METABOLISM_OF_XENOBIOTICS_BY_CYTOCHROME_P450         | -0.050642 | -0.02922  | -1.878295 | 0.060906 | 0.084542 | -5.45871  |
| KEGG_APOPTOSIS                                            | -0.054734 | -0.014625 | -1.85402  | 0.064309 | 0.088603 | -5.503552 |
| KEGG_TYPE_II_DIABETES_MELLITUS                            | 0.040334  | -0.018781 | 1.845925  | 0.065478 | 0.08955  | -5.518377 |
| KEGG_PRIMARY_BILE_ACID_BIOSYNTHESIS                       | 0.05005   | -0.022434 | 1.842197  | 0.066022 | 0.089636 | -5.525183 |
| KEGG_FC_GAMMA_R_MEDIATED_PHAGOCYTOSIS                     | -0.053135 | -0.01314  | -1.809042 | 0.071028 | 0.095734 | -5.585113 |
| KEGG_ALDOSTERONE_REGULATED_SODIUM_REABSORPTION            | 0.043091  | -0.015956 | 1.791273  | 0.073837 | 0.098804 | -5.616791 |
| KEGG_LYSOSOME                                             | -0.05557  | -0.006039 | -1.707639 | 0.088307 | 0.117322 | -5.761737 |
| KEGG_LONG_TERM_DEPRESSION                                 | 0.035065  | -0.019707 | 1.632528  | 0.103181 | 0.13611  | -5.886073 |
| KEGG_TGF_BETA_SIGNALING_PATHWAY                           | -0.041551 | -0.018218 | -1.606726 | 0.108728 | 0.142419 | -5.927508 |
| KEGG_PRIMARY_IMMUNODEFICIENCY                             | 0.062369  | -0.002013 | 1.597753  | 0.110712 | 0.144003 | -5.941764 |
| KEGG_HISTIDINE_METABOLISM                                 | -0.036857 | -0.028017 | -1.510267 | 0.13159  | 0.16997  | -6.076617 |
| KEGG_NON_SMALL_CELL_LUNG_CANCER                           | -0.0445   | -0.020469 | -1.502669 | 0.133538 | 0.171297 | -6.087973 |
| KEGG_COMPLEMENT_AND_COAGULATION_CASCADES                  | 0.036433  | -0.006965 | 1.373747  | 0.170119 | 0.216407 | -6.272011 |
| KEGG_NEUROTROPHIN_SIGNALING_PATHWAY                       | -0.040801 | -0.013307 | -1.370812 | 0.171032 | 0.216407 | -6.276011 |
| KEGG_GLYCEROPHOSPHOLIPID_METABOLISM                       | 0.030883  | -0.018392 | 1.34768   | 0.178355 | 0.224127 | -6.307233 |
| KEGG_FATTY_ACID_METABOLISM                                | -0.040115 | -0.022206 | -1.343995 | 0.179543 | 0.224127 | -6.312157 |
| KEGG_O_GLYCAN_BIOSYNTHESIS                                | -0.034714 | -0.020791 | -1.314855 | 0.189145 | 0.234539 | -6.350631 |
| KEGG_SULFUR_METABOLISM                                    | -0.03653  | -0.020348 | -1.282503 | 0.200244 | 0.246658 | -6.392365 |
| KEGG_ACUTE_MYELOID_LEUKEMIA                               | -0.040067 | -0.012176 | -1.275022 | 0.202877 | 0.248258 | -6.401869 |
| KEGG_WNT_SIGNALING_PATHWAY                                | -0.030975 | -0.017947 | -1.267064 | 0.205706 | 0.250074 | -6.411917 |
| KEGG_GLYCOSAMINOGLYCAN_DEGRADATION                        | -0.038493 | -0.007653 | -1.236695 | 0.216765 | 0.261807 | -6.449691 |
| KEGG_OTHER_GLYCAN_DEGRADATION                             | -0.042049 | -0.011183 | -1.229849 | 0.219316 | 0.262538 | -6.458079 |
| KEGG_ARRHYTHMOGENIC_RIGHT_VENTRICULAR_CARDIOMYOPATHY_ARVC | 0.032139  | -0.016561 | 1.227509  | 0.220193 | 0.262538 | -6.460936 |
| KEGG_NATURAL_KILLER_CELL_MEDIATED_CYTOTOXICITY            | -0.034189 | -0.008489 | -1.209555 | 0.227005 | 0.268936 | -6.482676 |
| KEGG_CHEMOKINE_SIGNALING_PATHWAY                          | -0.033196 | -0.008947 | -1.184377 | 0.236811 | 0.278777 | -6.512626 |
| KEGG_ENDOMETRIAL_CANCER                                   | -0.037408 | -0.016541 | -1.171321 | 0.242012 | 0.283109 | -6.52791  |
| KEGG_GLYCOSAMINOGLYCAN_BIOSYNTHESIS_CHONDROITIN_SULFATE   | -0.035828 | -0.008862 | -1.130065 | 0.258976 | 0.301059 | -6.5751   |

|                                                     |           |           |           |          |          |           |
|-----------------------------------------------------|-----------|-----------|-----------|----------|----------|-----------|
| KEGG_ERBB_SIGNALING_PATHWAY                         | -0.030561 | -0.01742  | -1.089785 | 0.276318 | 0.319225 | -6.619547 |
| KEGG_FOCAL_ADHESION                                 | -0.031469 | -0.010454 | -1.07472  | 0.283004 | 0.324931 | -6.635759 |
| KEGG_MELANOGENESIS                                  | 0.022711  | -0.014975 | 1.042123  | 0.297844 | 0.339871 | -6.670067 |
| KEGG_ECM_RECEPTOR_INTERACTION                       | 0.031832  | -0.007888 | 0.99585   | 0.319791 | 0.36269  | -6.716962 |
| KEGG_VIRAL_MYOCARDITIS                              | 0.031135  | -0.003898 | 0.98424   | 0.32546  | 0.366164 | -6.728395 |
| KEGG_AXON_GUIDANCE                                  | -0.024937 | -0.012636 | -0.981533 | 0.326792 | 0.366164 | -6.731042 |
| KEGG_GLYCOSPHINGOLIPID_BIOSYNTHESIS_GANGLIO_SERIES  | -0.026971 | -0.020059 | -0.86752  | 0.386062 | 0.429985 | -6.835915 |
| KEGG_PROXIMAL_TUBULE_BICARBONATE_RECLAIMATION       | -0.017988 | -0.027752 | -0.762647 | 0.446024 | 0.493812 | -6.920992 |
| KEGG_T_CELL_RECEPTOR_SIGNALING_PATHWAY              | 0.021619  | -0.012448 | 0.706841  | 0.479986 | 0.528268 | -6.961812 |
| KEGG_PPAR_SIGNALING_PATHWAY                         | -0.013925 | -0.022642 | -0.672778 | 0.501391 | 0.54858  | -6.985207 |
| KEGG_LEUKOCYTE_TRANSENDOTHELIAL_MIGRATION           | -0.017487 | -0.008996 | -0.642911 | 0.520568 | 0.566232 | -7.004771 |
| KEGG_INOSITOL_PHOSPHATE_METABOLISM                  | 0.018332  | -0.015631 | 0.629428  | 0.529349 | 0.572435 | -7.013313 |
| KEGG_GRAFT_VERSUS_HOST_DISEASE                      | 0.020338  | 0.000209  | 0.474316  | 0.635476 | 0.680197 | -7.098571 |
| KEGG_LEISHMANIA_INFECTION                           | 0.016519  | 0.004473  | 0.473141  | 0.636314 | 0.680197 | -7.099126 |
| KEGG_DORSO_VENTRAL_AXIS_FORMATION                   | -0.013021 | -0.022796 | -0.465534 | 0.641746 | 0.680331 | -7.102682 |
| KEGG_RENIN_ANGIOTENSIN_SYSTEM                       | 0.013426  | -0.017151 | 0.460464  | 0.645378 | 0.680331 | -7.10502  |
| KEGG_DRUG_METABOLISM_CYTOCHROME_P450                | 0.011983  | -0.026743 | 0.45763   | 0.647411 | 0.680331 | -7.106316 |
| KEGG_VEGF_SIGNALING_PATHWAY                         | 0.006718  | -0.016058 | 0.27616   | 0.782536 | 0.816138 | -7.172651 |
| KEGG_NITROGEN_METABOLISM                            | 0.005951  | -0.035188 | 0.2724    | 0.785424 | 0.816138 | -7.173678 |
| KEGG_TYPE_I_DIABETES_MELLITUS                       | 0.008905  | 0.002698  | 0.236749  | 0.812946 | 0.840044 | -7.182722 |
| KEGG_GLYCOSAMINOGLYCAN_BIOSYNTHESIS_HEPARAN_SULFATE | -0.005731 | -0.021545 | -0.211348 | 0.8327   | 0.855702 | -7.188393 |
| KEGG_MAPK_SIGNALING_PATHWAY                         | -0.00414  | -0.013437 | -0.180958 | 0.856472 | 0.875295 | -7.194334 |
| KEGG_B_CELL_RECEPTOR_SIGNALING_PATHWAY              | 0.00525   | -0.011728 | 0.166351  | 0.867946 | 0.881027 | -7.196861 |
| KEGG_RETINOL_METABOLISM                             | -0.004016 | -0.031174 | -0.161766 | 0.871554 | 0.881027 | -7.197611 |
| KEGG_CYTOKINE_CYTOKINE_RECEPTOR_INTERACTION         | 0.003252  | -0.003649 | 0.12269   | 0.9024   | 0.907278 | -7.203149 |
| KEGG_LONG_TERM_POTENTIATION                         | -0.001866 | -0.021488 | -0.077012 | 0.938644 | 0.938644 | -7.207695 |

---

**Supplementary Table 8. Lists of drugs in CTRP and PRISM.**

| <b>CTRP</b>               | <b>PRISM</b>                                         |
|---------------------------|------------------------------------------------------|
| 968                       | 10-deacetylbaaccatin                                 |
| 16-beta-bromoandrosterone | 10-hydroxycamptothecin                               |
| 1S,3R-RSL-3               | 12-O-tetradecanoylphorbol-13-acetate                 |
| 3-Cl-AHPC                 | 1-azakenpaullone                                     |
| 5-fluorouracil            | 1-naphthyl-PP1                                       |
| A-804598                  | 1-phenylbiguanide                                    |
| AA-COCF3                  | 2,3-DCPE                                             |
| abiraterone               | 2-MeCCPA                                             |
| ABT-199                   | 2-methoxyestradiol                                   |
| ABT-737                   | 3-amino-benzamide                                    |
| AC55649                   | 3-deazaneplanocin-A                                  |
| afatinib                  | 3-fluorobenzylpiperone                               |
|                           | 4-(4-fluorobenzoyl)-1-(4-phenylbutyl)-piperid<br>ine |
| AGK-2                     | 4-chlorophenylguanidine                              |
| alisertib                 | 4E1RCat                                              |
| alvocidib                 | 4-hydroxy-phenazone                                  |
| AM-580                    | 4-iodo-6-phenylpyrimidine                            |
| apicidin                  | 4-methylgenistein                                    |
| AT13387                   | 4-methylhistamine                                    |
| AT-406                    | 4-pyrimidinecarbonitrile                             |
| AT7867                    | 5-fluorouracil                                       |
| austocystin D             | 5-hydroxymethyl-tolterodine                          |
| avicin D                  | 7-aminocephalosporanic-acid                          |
| avrainvillamide           | 7-hydroxystaurosporine                               |
| axitinib                  | 7-nitroindazole                                      |
| AZ-3146                   | 8-bromo-cGMP                                         |
| azacitidine               | 8-hydroxy-PIPAT                                      |
| AZD1480                   | 9-aminoacridine                                      |
| AZD4547                   | A61603                                               |
| AZD6482                   | A-674563                                             |
| AZD7545                   | A-803467                                             |
| AZD7762                   | abemaciclib                                          |
| AZD8055                   | abiraterone                                          |
| B02                       | abiraterone-acetate                                  |
| bafilomycin A1            | ABT-702                                              |
| barasertib                | ABT-737                                              |
| bardoxolone methyl        | ABT-751                                              |
| Bax channel blocker       | AC-264613                                            |
| BCL-LZH-4                 | ACDPP                                                |
| BEC                       | acesulfame-potassium                                 |
| belinostat                |                                                      |



|                |                             |
|----------------|-----------------------------|
| bendamustine   | acetazolamide               |
| betulinic acid | acetophenazine              |
| bexarotene     | acetylcysteine              |
| BI-2536        | acetylsalicylsalicylic-acid |
| BIBR-1532      | acipimox                    |
| BIRB-796       | acivicin                    |
| birinapant     | ACY-1215                    |
| BIX-01294      | adapalene                   |
| blebbistatin   | adaprev                     |
| bleomycin A2   | adarotene                   |
| BMS-195614     | adefovir-dipivoxil          |
| BMS-270394     | ADL5859                     |
| BMS-345541     | AEE788                      |
| BMS-536924     | AEQ3482                     |
| BMS-754807     | afatinib                    |
| bortezomib     | afobazole                   |
| bosutinib      | AG-14361                    |
| BRD1812        | ajmaline                    |
| BRD1835        | albendazole                 |
| BRD4132        | alectinib                   |
| BRD6340        | alexidine                   |
| BRD8899        | alfacalcidol                |
| BRD8958        | alisertib                   |
| BRD9647        | almorexant                  |
| BRD9876        | alogliptin                  |
| BRD-A02303741  | alpelisib                   |
| BRD-A05715709  | altretamine                 |
| BRD-A71883111  | alvespimycin                |
| BRD-A86708339  | alvocidib                   |
| BRD-A94377914  | AM-251                      |
| BRD-K01737880  | AM-404                      |
| BRD-K02251932  | AM-580                      |
| BRD-K02492147  | ambazone                    |
| BRD-K04800985  | amfenac                     |
| BRD-K09344309  | AMG-208                     |
| BRD-K09587429  | AMG-232                     |
| BRD-K11533227  | AMG458                      |
| BRD-K13999467  | AMG900                      |
| BRD-K14844214  | aminoglutethimide           |
| BRD-K16147474  | aminopurvalanol-a           |
| BRD-K17060750  | amisulpride                 |
| BRD-K19103580  | ammonium-lactate            |
| BRD-K24690302  | amonafide                   |

|               |                               |
|---------------|-------------------------------|
| BRD-K26531177 | amoxicillin                   |
| BRD-K27224038 | amprolium                     |
| BRD-K27986637 | amsacrine                     |
| BRD-K28456706 | anagrelide                    |
| BRD-K29086754 | anastrozole                   |
| BRD-K29313308 | anguidine                     |
| BRD-K30019337 | anisomycin                    |
| BRD-K30748066 | AP1903                        |
| BRD-K33199242 | AP26113                       |
| BRD-K33514849 | apatinib                      |
| BRD-K34099515 | aphidicolin                   |
| BRD-K34222889 | AR-12                         |
| BRD-K34485477 | AR-42                         |
| BRD-K35604418 | arctigenin                    |
| BRD-K37390332 | arcyriaflavin-a               |
| BRD-K41334119 | aripiprazole                  |
| BRD-K41597374 | ARRY-334543                   |
| BRD-K42260513 | artemisinin                   |
| BRD-K44224150 | artesunate                    |
| BRD-K45681478 | AS-1949490                    |
| BRD-K48334597 | AS-703026                     |
| BRD-K48477130 | aspirin                       |
| BRD-K49290616 | AST-1306                      |
| BRD-K50799972 | astemizole                    |
| BRD-K51490254 | asymmetrical-dimethylarginine |
| BRD-K51831558 | AT13387                       |
| BRD-K52037352 | AT-7519                       |
| BRD-K55116708 | AT7867                        |
| BRD-K61166597 | AT-9283                       |
| BRD-K63431240 | atenolol(-)                   |
| BRD-K64610608 | atenolol(+/-)                 |
| BRD-K66453893 | atipamezole                   |
| BRD-K66532283 | atiprimod                     |
| BRD-K70511574 | atorvastatin                  |
| BRD-K71781559 | aurora-a-inhibitor-i          |
| BRD-K71935468 | AV-412                        |
| BRD-K75293299 | avanafil                      |
| BRD-K78574327 | AVL-292                       |
| BRD-K80183349 | AVN-944                       |
| BRD-K84807411 | axitinib                      |
| BRD-K85133207 | AZ20                          |
| BRD-K86535717 | AZ3146                        |
| BRD-K88742110 | AZ-628                        |

|                     |                             |
|---------------------|-----------------------------|
| BRD-K90370028       | AZ960                       |
| BRD-K92856060       | azacitidine                 |
| BRD-K94991378       | azalomycin-b                |
| BRD-K96431673       | azathioprine                |
| BRD-K96970199       | AZD1480                     |
| BRD-K97651142       | AZD2014                     |
| BRD-K99006945       | AZD2461                     |
| BRD-M00053801       | AZD2858                     |
| brefeldin A         | AZD3463                     |
| brivanib            | AZD4547                     |
| BYL-719             | AZD5363                     |
| C6-ceramide         | AZD5438                     |
| cabozantinib        | AZD6482                     |
| canertinib          | AZD7762                     |
| CAY10576            | AZD8055                     |
| CAY10594            | AZD8330                     |
| CAY10618            | AZD8931                     |
| CBB-1007            | AZD9668                     |
| CCT036477           | azilsartan                  |
| CD-1530             | azithromycin                |
| CD-437              | azodicarbonamide            |
| cediranib           | azomycin-(2-nitroimidazole) |
| ceranib-2           | aztreonam                   |
| cerulenin           | bafetinib                   |
| Ch-55               | baicalein                   |
| CHIR-99021          | baicalin                    |
| chlorambucil        | balapiravir                 |
| CHM-1               | BAM7                        |
| CI-976              | BAN-ORL-24                  |
| ciclopirox          | barasertib                  |
| ciclosporin         | barasertib-HQPA             |
| CID-5951923         | bardoxolone                 |
| CIL41               | bardoxolone-methyl          |
| CIL55               | baricitinib                 |
| CIL55A              | batimastat                  |
| CIL56               | BAY-11-7082                 |
| CIL70               | BAY-11-7085                 |
| cimetidine          | BAY-87-2243                 |
| clofarabine         | BAY-K-8644-(s)-(-)          |
| COL-3               | beclomethasone-dipropionate |
| Compound 1541A      | bekanamycin                 |
| compound 1B         | belinostat                  |
| Compound 23 citrate | bendamustine                |

|                                |                                  |
|--------------------------------|----------------------------------|
| Compound 7d-cis                | bendroflumethiazide              |
| CR-1-31B                       | benfotiamine                     |
| crizotinib                     | bentazepam                       |
| cucurbitacin I                 | benzethonium                     |
| curcumin                       | benzocaine                       |
| cyanquinoline 11               | benzylamine                      |
| cyclophosphamide               | benzyltrimethylhexadecylammonium |
| cytarabine hydrochloride       | bephenium-hydroxynaphthoate      |
| cytochalasin B                 | berberine                        |
| dabrafenib                     | beta-lapachone                   |
| dacarbazine                    | betamethasone                    |
| darinaparsin                   | betamethasone-dipropionate       |
| dasatinib                      | beta-naphthol                    |
| DBeQ                           | betulinic-acid                   |
| decitabine                     | bexarotene                       |
| dexamethasone                  | BF2.649                          |
| dinaciclib                     | BGT226                           |
| docetaxel                      | BI-2536                          |
| doxorubicin                    | BI-78D3                          |
| ELCPK                          | BIBR-1532                        |
| elocalcitol                    | BIBU-1361                        |
| entinostat                     | BIBX-1382                        |
| epigallocatechin-3-monogallate | bicalutamide                     |
| erastin                        | BI-D1870                         |
| erismodegib                    | bifemelane                       |
| erlotinib                      | BIIB021                          |
| etomoxir                       | bindarit                         |
| etoposide                      | birinapant                       |
| ETP-46464                      | bis(maltolato)oxovanadium(IV)    |
| EX-527                         | bisacodyl                        |
| FGIN-1-27                      | bisindolylmaleimide-ix           |
| ingolimod                      | bitopertin                       |
| FK-866                         | BIX-01294                        |
| fluvastatin                    | BIX-02188                        |
| foretinib                      | blebbistatin(-)                  |
| FQI-1                          | BMS-265246                       |
| FQI-2                          | BMS-345541                       |
| FSC231                         | BMS-387032                       |
| fulvestrant                    | BMS-599626                       |
| fumonisin B1                   | BMS-626529                       |
| GANT-61                        | BMS-690514                       |
| GDC-0879                       | BMS-707035                       |
| GDC-0941                       | BMS-754807                       |

|                            |                              |
|----------------------------|------------------------------|
| gefitinib                  | BMS-986020                   |
| gemcitabine                | BNC105                       |
| GMX-1778                   | BNTX                         |
| gossypol                   | bortezomib                   |
| GSK1059615                 | bosentan                     |
| GSK2636771                 | bosutinib                    |
| GSK-3 inhibitor IX         | brefeldin-a                  |
| GSK4112                    | brequinar                    |
| GSK461364                  | brigatinib                   |
| GSK-J4                     | brilliant-green              |
| GW-405833                  | brivaracetam                 |
| GW-843682X                 | bromosporine                 |
| HBX-41108                  | broxaldine                   |
| HC-067047                  | broxyquinoline               |
| HLI 373                    | bruceantin                   |
| hyperforin                 | BTS-54505                    |
| I-BET151                   | bucladesine                  |
| I-BET-762                  | bumetanide                   |
| ibrutinib                  | buparlisib                   |
| IC-87114                   | buphenine                    |
| idelalisib                 | busulfan                     |
| ifosfamide                 | butamben                     |
| imatinib                   | buthionine-sulfoximine       |
| importazole                | butylscopolamine-bromide     |
| indisulam                  | BVD-523                      |
| IPR-456                    | BVT-948                      |
| isoevodiamine              | BW-180C                      |
| isoliquiritigenin          | BX-912                       |
| isonicotinohydroxamic acid | cabazitaxel                  |
| ISOX                       | cabozantinib                 |
| istradefylline             | caffeic-acid                 |
| itraconazole               | caffeic-acid-phenethyl-ester |
| IU1                        | calcitriol                   |
| JQ-1                       | camptothecin                 |
| JW-480                     | camylofine-chlorhydrate      |
| JW-55                      | candesartan                  |
| JW-74                      | canertinib                   |
| KH-CB19                    | canrenone                    |
| KHS101                     | capecitabine                 |
| Ki8751                     | capsaicin                    |
| Ko-143                     | captamine                    |
| KPT185                     | carbachol                    |
| KU 0060648                 | carboplatin                  |

|                 |                           |
|-----------------|---------------------------|
| KU-0063794      | carboxyamidotriazole      |
| KU-55933        | carboxypyridine-disulfide |
| KU-60019        | carfilzomib               |
| KW-2449         | cariporide                |
| KX2-391         | carmofur                  |
| L-685458        | carmustine                |
| lapatinib       | carvedilol                |
| LBH-589         | CB-10-277                 |
| LE-135          | CCG-50014                 |
| lenvatinib      | CCMI                      |
| leptomycin B    | CCT128930                 |
| linifanib       | CCT129202                 |
| linsitinib      | CCT137690                 |
| lomeguatrib     | CD-437                    |
| lovastatin      | cebranopadol              |
| LRRK2-IN-1      | cediranib                 |
| LY-2157299      | cefdinir                  |
| LY-2183240      | cefditoren-pivoxil        |
| manumycin A     | cefpiramide               |
| marinopyrrole A | CEP-32496                 |
| masitinib       | CEP-33779                 |
| Mdivi-1         | CEP-37440                 |
| Merck60         | cephalomannine            |
| methotrexate    | cetrimonium               |
| methylstat      | cetylpyridinium           |
| MG-132          | CGM097                    |
| MGCD-265        | CGP-37849                 |
| MI-1            | CGP-52411                 |
| MI-2            | CGP-54626                 |
| mitomycin-c     | CGS-15943                 |
| MK-0752         | CGS-20625                 |
| MK-1775         | CH5132799                 |
| MK-2206         | chicago-sky-blue-6b       |
| ML006           | chidamide                 |
| ML029           | CHIR-124                  |
| ML031           | CHIR-98014                |
| ML050           | CHIR-99021                |
| ML083           | chlorambucil              |
| ML162           | chloramphenicol-palmitate |
| ML203           | chlorhexidine             |
| ML210           | chlorindanol              |
| ML239           | chlormidazole             |
| ML258           | chlorogenic-acid          |

|                                      |                       |
|--------------------------------------|-----------------------|
| ML311                                | chloropyramine        |
| ML312                                | chloroxine            |
| ML320                                | chlorpropamide        |
| ML334 diastereomer                   | chlorpyrifos          |
| MLN2238                              | chlorquinaldol        |
| MLN2480                              | cholecalciferol       |
| momelotinib                          | chromocarb            |
| MST-312                              | CI-844                |
| myricetin                            | cibenzoline           |
| myriocin                             | ciclesonide           |
| N9-isopropylolomoucine               | ciclopirox            |
| nakiterpiosin                        | CID-5458317           |
| narciclasine                         | cidofovir             |
| navitoclax                           | cilostamide           |
| necrostatin-1                        | cimetidine            |
| necrostatin-7                        | cinacalcet            |
| necrosulfonamide                     | cinalukast            |
| nelarabine                           | cinnarazine           |
| neopeltolide                         | cinromide             |
| neratinib                            | ciprofibrate          |
| neuronal differentiation inducer III | cisplatin             |
| niclosamide                          | CL-218872             |
| nilotinib                            | cladribine            |
| nintedanib                           | clebopride            |
| NPC-26                               | clenbuterol           |
| NSC 74859                            | clindamycin-phosphate |
| NSC19630                             | clobetasol-propionate |
| NSC23766                             | clobutinol            |
| NSC30930                             | clocortolone-pivalate |
| NSC48300                             | clofarabine           |
| NSC632839                            | clofazimine           |
| NSC95397                             | clofibrate            |
| nutlin-3                             | clofoctol             |
| NVP-231                              | clomifene             |
| NVP-ADW742                           | clonazepam            |
| NVP-BEZ235                           | clopamide             |
| NVP-BSK805                           | clotrimazole          |
| NVP-TAE684                           | CPMD-1                |
| O-6-benzylguanine                    | CNX-2006              |
| obatoclax                            | CNX-774               |
| olaparib                             | cobicistat            |
| oligomycin A                         | cobimetinib           |

|                           |                       |
|---------------------------|-----------------------|
| omacetaxine mepesuccinate | colchicine            |
| OSI-027                   | colforsin-daproate    |
| OSI-930                   | colfosceril-palmitate |
| ouabain                   | colistin-b-sulfate    |
| PAC-1                     | combretastatin-A-4    |
| paclitaxel                | costunolide           |
| palmostatin B             | CP-673451             |
| pandacostat               | CP-724714             |
| parbendazole              | CP-945,598            |
| parthenolide              | CPI-1189              |
| pazopanib                 | CPP                   |
| PD 153035                 | CR8-(R)               |
| PD318088                  | creatine              |
| PDMP                      | crenolanib            |
| pevonedistat              | crizotinib            |
| PF-184                    | crizotinib-(S)        |
| PF-3758309                | cromakalim            |
| PF-4800567 hydrochloride  | crystal-violet        |
| PF-543                    | CS-110266             |
| PF-573228                 | CUDC-101              |
| PF-750                    | CUDC-907              |
| PHA-793887                | curcumin              |
| phloretin                 | CX-4945               |
| PI-103                    | CX-5461               |
| pifithrin-alpha           | CYC116                |
| pifithrin-mu              | cyclocytidine         |
| PIK-93                    | cycloheximide         |
| piperlongumine            | cyclophosphamide      |
| pitstop2                  | cyclosporin-a         |
| PL-DI                     | cyclosporine          |
| pluripotin                | cyclovalone           |
| PLX-4032                  | cyclovirobuxin-d      |
| PLX-4720                  | cyproheptadine        |
| PRIMA-1                   | cyproterone-acetate   |
| PRIMA-1-Met               | cyromazine            |
| PRL-3 inhibitor I         | cyt387                |
| procarbazine              | CYT-997               |
| prochlorperazine          | cytarabine            |
| purmorphamine             | cytochalasin-b        |
| PX-12                     | cytochlor             |
| PYR-41                    | D-4476                |
| pyrazolanthrone           | D-64131               |
| QS-11                     | D-7193                |



|               |                             |
|---------------|-----------------------------|
| quizartinib   | dabrafenib                  |
| QW-BI-011     | dacarbazine                 |
| R428          | dacinostat                  |
| RAF265        | daclatasvir                 |
| regorafenib   | dacomitinib                 |
| Repligen 136  | dalcetrapib                 |
| RG-108        | danazol                     |
| rigosertib    | danusertib                  |
| RITA          | dapivirine                  |
| RO4929097     | darapladib                  |
| ruxolitinib   | darifenacin                 |
| salermide     | dasatinib                   |
| saracatinib   | daunorubicin                |
| SB-225002     | DCEBIO                      |
| SB-431542     | decitabine                  |
| SB-525334     | defactinib                  |
| SB-743921     | deferasirox                 |
| SCH-529074    | deflazacort                 |
| SCH-79797     | deforolimus                 |
| selumetinib   | dehydrocholate-acid         |
| semagacestat  | delanzomib                  |
| serdemetan    | demecarium                  |
| SGX-523       | deoxycorticosterone-acetate |
| SID 26681509  | dequalinium                 |
| sildenafil    | desonide                    |
| silmitasertib | desoxycortone               |
| simvastatin   | dexamethasone-acetate       |
| sirolimus     | dexrazoxane                 |
| sitagliptin   | dianhydrogalactitol         |
| SJ-172550     | diaveridine                 |
| skepinone-L   | diazooxonorleucine          |
| SKI-II        | dichlorisone-acetate        |
| SMER-3        | dichloroacetate             |
| SN-38         | dichlorvos                  |
| SNS-032       | diclazuril                  |
| SNX-2112      | dicycloverine               |
| sorafenib     | dienogest                   |
| sotrastaurin  | difluprednate               |
| spautin-1     | digitoxigenin               |
| SR1001        | digitoxin                   |
| SR8278        | digoxigenin                 |
| SR-II-138A    | digoxin                     |
| SRT-1720      | dihydroartemisinin          |

|                     |                            |
|---------------------|----------------------------|
| staurosporine       | dihydroergocristine        |
| StemRegenin 1       | dihydromyricetin           |
| STF-31              | dimethisoquin              |
| SU11274             | dinaciclib                 |
| sunitinib           | dioscin                    |
| SZ4TA2              | diphemanil                 |
| tacedinaline        | diphenyleiodonium          |
| tacrolimus          | dirithromycin              |
| tamatinib           | disulfiram                 |
| tamoxifen           | DMH1                       |
| tandutinib          | docetaxel                  |
| tanespimycin        | dofetilide                 |
| temozolomide        | dolastatin-10              |
| temsirolimus        | dolutegravir               |
| teniposide          | domiphen                   |
| TG-100-115          | domperidone                |
| TG-101348           | dorzolamide                |
| TGX-221             | dovitinib                  |
| thalidomide         | doxercalciferol            |
| tigecycline         | doxifluridine              |
| tipifarnib          | doxorubicin                |
| tipifarnib-P2       | doxycycline                |
| tivantinib          | DPI-201106                 |
| tivozanib           | dronedarone                |
| topotecan           | drospirenone               |
| tosedostat          | D-Serine                   |
| tozasertib          | DU-728                     |
| TPCA-1              | DVD-111                    |
| trametinib          | E7449                      |
| tretinoin           | ebastine                   |
| triazolothiadiazine | ecamsule-triethanolamine   |
| trifluoperazine     | echinomycin                |
| triptolide          | efonidipine-monoethanolate |
| tubastatin A        | elacridar                  |
| TW-37               | elesclomol                 |
| UNC0321             | eltrombopag                |
| UNC0638             | embelin                    |
| VAF-347             | EMD-53998                  |
| valdecoxib          | emetine                    |
| vandetanib          | endo-IWR-1                 |
| veliparib           | ENMD-2076                  |
| VER-155008          | enocitabine                |
| vincristine         | enoximone                  |

vorapaxar  
vorinostat  
VU0155056  
WAY-362450  
WP1130  
WZ4002  
WZ8040  
XL765  
YK 4-279  
YM-155  
zebularine  
ZSTK-474

entinostat  
enzalutamide  
epiandrosterone  
epinastine  
epinephrine  
epirubicin  
eplerenone  
epothilone-a  
epothilone-b  
epothilone-d  
epinomectin  
eprobemide  
eprosartan  
eptifibatide  
EPZ-5676  
equol  
ER-27319  
erastin  
ercalcitriol  
erdafitinib  
erlotinib  
erteberel  
erythritol  
estradiol  
estradiol-benzoate  
estradiol-cypionate  
estramustine  
estramustine-phosphate  
estrone  
ethacridine-lactate-monohydrate  
ethinyl-estradiol  
etofylline-clofibrate  
etomoxir  
etoposide  
etoposide-phosphate  
ETP-46464  
evacetrapib  
everolimus  
evodiamine  
EVP4593  
exatecan-mesylate  
exemestane  
famciclovir

famotidine  
favipiravir  
fdcyd  
felbamate  
fenaclon  
fenbendazole  
fendiline  
fenofibrate  
fenoprofen  
fenretinide  
FERb-033  
fexinidazole  
FG-4592  
filanesib  
filgotinib  
finafloxacin  
FK-3311  
FK-866  
FK-888  
fleroxacin  
FLI-06  
florfenicol  
floxuridine  
flubendazole  
fludarabine  
fludarabine-phosphate  
fludroxycortide  
flufenamic-acid  
flumatinib  
flumethasone  
flumethasone-pivalate  
fluocinolone-acetonide  
fluorometholone  
fluoromethylcholine  
fluroxene  
flutamide  
fluticasone-propionate  
fluvastatin  
foretinib  
formestane  
forodesine  
forskolin  
fosbretabulin

foscarnet  
FPH1-(BRD-6125)  
FR-122047  
FR-139317  
frentizole  
ftorafur  
fudosteine  
fulvestrant  
G-1  
galeterone  
gambogic-acid  
gamma-aminobutyric-acid  
ganetespib  
gastrodin  
GDC-0068  
GDC-0152  
GDC-0349  
GDC-0879  
GDC-0941  
GDC-0980  
gefitinib  
gemcitabine  
genipin  
genz-644282  
gestrinone  
GGTI-298  
gidazepam  
gilteritinib  
gimeracil  
ginkgolide-a  
givinostat  
golgicide-a  
golvatinib  
gossypol  
GS-39783  
GS-9973  
GSK1070916  
GSK1292263  
GSK1838705A  
GSK1904529A  
GSK2110183  
GSK2126458  
GSK256066

GSK2656157  
GSK2830371  
GSK-3-inhibitor-IX  
GSK429286A  
GSK461364  
GSK650394  
GSK923295  
GSK-J4  
GTP-14564  
guanidine  
GW-3965  
GW-405833  
GW-441756  
GW-501516  
GW-583340  
GW-788388  
GW-842166  
GW-843682X  
GZD824  
HA14-1  
halcinonide  
halobetasol-propionate  
halofantrine  
halofuginone  
harringtonine  
hesperadin  
hexachlorophene  
hexaminolevulinate  
hexylresorcinol  
HMN-214  
homoharringtonine  
homoquinolinic-acid  
homosalate  
hydrocortisone  
hydroxytacrine-maleate-(r,s)  
hydroxyurea  
hyodeoxycholic-acid  
hyoscyamine  
hypericin  
hypoestoxide  
I-BET151  
I-BET-762  
ibrutinib

ibutilide  
ICG-001  
ICI-162846  
icotinib  
idarubicin  
idasanutlin  
idazoxan  
idelalisib  
idoxuridine  
IDRA-21  
idronoxil  
IEM1754  
ifosfamide  
IKK-16  
IKK-2-inhibitor-V  
ilomastat  
imatinib  
imidapril  
imiloxan  
imiquimod  
INC-280  
indibulin  
indiplon  
indirubin  
indisulam  
indoprofen  
ingenol-mebutate  
INH1  
inosine  
iobenguane  
iodipamide  
iododexetimide  
IOWH032  
iproniazid  
ipsapirone  
irinotecan  
isoetharine  
isofloxythepin  
isoflupredone-acetate  
isometheptene-mucate  
isopropyl-myristate  
isoxsuprine  
ispinesib

istradefylline  
itraconazole  
ivermectin  
ixabepilone  
ixazomib  
ixazomib-citrate  
JIB04  
JK-184  
JNJ-16259685  
JNJ-26481585  
JNJ-7706621  
josamycin  
JQ1  
JTC-801  
JTE-607  
JZL-184  
K-858  
KD-023  
KD025  
kenpaullone  
ketoconazole  
ketoprofen  
KF-38789  
KI-16425  
KI-8751  
kifunensine  
KP-1212  
KPT-185  
KPT-276  
K-Ras(G12C)-inhibitor-6  
k-strophanthidin  
ku-0063794  
KW-2449  
KW-2478  
KX2-391  
KY02111  
kynurenic-acid  
L-798,106  
lacitol  
lafutidine  
lanatoside-c  
lanoconazole  
lapatinib



lappaconite  
lasalocid  
latanoprost  
latrepirdine  
LB42708  
LCL-161  
LDN-212854  
LDN-57444  
LE-135  
lenalidomide  
lenvatinib  
lerisetron  
lestaurtinib  
letrozole  
leucovorin  
levobunolol  
levocarnitine  
levocetirizine  
levonorgestrel  
LGX818  
licoalcone-a  
lidamidine  
lidocaine  
linalool  
linifanib  
linsitinib  
litronesib  
lomefloxacin  
lomitapide  
lonafarnib  
lorazepam  
lorlatinib  
lovastatin  
loxistatin-acid  
lucitanib  
lurasidone  
LY2090314  
LY2109761  
LY2183240  
LY2334737  
LY2603618  
LY2606368  
LY2608204

LY2784544  
LY2801653  
LY2874455  
LY3023414  
LY303511  
LY364947  
LY456236  
M-344  
maprotiline  
marimastat  
masitinib  
maxacalcitol  
maytansinol-isobutyrate  
mebendazole  
mechlorethamine  
meclizine  
mefexamide  
meglitinide  
MEK1-2-inhibitor  
MEK162  
melengestrol-acetate  
meloxicam  
melphalan  
menadione  
mephenytoin  
mepivacaine  
mercaptopurine  
mericitabine  
merimepodib  
mesna  
mesoridazine  
metaraminol  
metatinib  
methacycline  
methiazole  
methocarbamol  
methotrexate  
methoxyflurane  
methscopolamine  
methyldopa  
methylphenidate  
methylprednisolone  
metoprolol

metoxibutropate  
metronidazole  
metyrapone  
mevastatin  
mexeneone  
mexiletine  
MG-132  
MGCD-265  
mibampator  
mibefradil  
midodrine  
midostaurin  
mifepristone  
minocycline  
mitomycin-c  
mitoxantrone  
MK-0773  
MK-0812  
MK-1775  
MK-2206  
MK-2461  
MK-3207  
MK-5108  
MK-8245  
MK-8745  
ML133  
MLN0128  
MLN-8054  
MNS-(3,4-Methylenedioxy-nitrostyrene)  
mocetinostat  
monensin  
monobenzene  
morin  
motesanib  
mozavaptan  
MPI-0479605  
MRS-1220  
MTPG  
mubritinib  
mycophenolate-mofetil  
mycophenolic-acid  
N-acetylmannosamine  
nadide

nadifloxacin  
nafcillin  
naftidrofuryl  
naftifine  
naloxone  
naltrexone  
NAN-190  
nanchangmycin  
napabucasin  
naproxen  
narasin  
narlaprevir  
navarixin  
navitoclax  
nefiracetam  
nelarabine  
nemonapride  
nemorubicin  
neratinib  
nexturastat-a  
NH125  
niacin  
niclosamide  
nicorandil  
nicotine  
nilotinib  
nilutamide  
nimorazole  
nintedanib  
niraparib  
niridazole  
nisooxetine  
nitarsone  
nithiamide  
nitisinone  
nitrocaramiphen  
nizatidine  
nizofenone  
NMS-1286937  
NMS-873  
NMS-E973  
nobiletin  
nocodazole

nomegestrol-acetate  
nonoxynol-9  
norepinephrine  
norethindrone  
norethindrone-acetate  
noretynodrel  
norfloxacin  
norgestrel  
novobiocin  
NSC-23766  
NSC-319726  
NSC-3852  
NSC-632839  
NSC-663284  
NSC-697923  
NU6027  
nutlin-3  
NVP-AEW541  
NVP-AUY922  
NVP-BEZ235  
NVP-BHG712  
NVP-BVU972  
NVP-TAE226  
NVP-TAE684  
obatoclax  
obidoxime  
octenidine  
octopamine  
odanacatib  
olaparib  
OLDA  
oleanolic-acid  
oleoylethanolamide  
oligomycin-a  
oltipraz  
omeprazole  
ONC201  
oncrasin-1  
ONX-0914  
oprozomib  
orantinib  
oridonin  
ornithine

orotic-acid  
oseltamivir-phosphate  
OSI-027  
OSI-420  
OSI-930  
osimertinib  
OTS167  
OTX015  
ouabain  
oxaliplatin  
oxazepam  
oxcarbazepine  
oxibendazole  
oxiperomide  
oxiracetam  
oxonic-acid  
oxprenolol  
oxymatrine  
oxymetazoline  
oxyphencyclimine  
oxyquinoline  
P22077  
P276-00  
P5091  
PAC-1  
paclitaxel  
pacritinib  
palbociclib  
paliperidone  
palmatine-chloride  
palmitoylethanolamide  
palomid-529  
panobinostat  
papaverine  
parachlorophenol  
parbendazole  
pardoprunox  
paricalcitol  
parthenolide  
parthenolide-(-)  
pazopanib  
PCI-24781  
PD-0325901

PD-153035  
PD-168393  
PD-173074  
PD-184352  
PD-198306  
PD-318088  
PD-407824  
PD-98059  
pelitinib  
penfluridol  
penicillamine-(D)  
pentagastrin  
pentamidine  
pentostatin  
pepstatin  
peruvoside  
PETCM  
pevonedistat  
PF-03758309  
PF-03814735  
PF-04136309  
PF-04217903  
PF-04457845  
PF-04691502  
PF-05212384  
PF-3845  
PF-477736  
PF-4981517  
PF-562271  
PF-573228  
PFI-1  
PFK-015  
PHA-665752  
PHA-680632  
PHA-767491  
PHA-793887  
PHA-848125  
phenazone  
phenelzine  
pheniramine  
phenylbutazone  
phenylmercuric-acetate  
phlorizin

PI-103  
PI3K-IN-2  
PI-828  
pibenzimol  
picolinic-acid  
PIK-75  
pilaralisib  
pilocarpine  
pindolol  
piperacetazine  
piperazine  
piperine  
pirenperone  
piretanide  
piroxicam  
pitavastatin  
PJ-34  
PKI-179  
plinabulin  
PLX-4720  
podophyllotoxin  
polydatin  
pomalidomide  
ponatinib  
posaconazole  
poziotinib  
PP-1  
PP-121  
PP-2  
PP242  
PPT  
PQ-401  
PR-619  
practolol  
pralatrexate  
pranidipine  
prazosin  
prednisolone  
prednisolone-acetate  
prednisolone-hemisuccinate  
prednisolone-tebutate  
primaquine  
proflavine-hemisulfate



propoxycaïne  
propranolol  
proscillaridin-a  
protirelin  
PRT062070  
PRT062607  
PSB-1115  
PSI-7976  
PTC-209  
pterostilbene  
PU-H71  
puromycin  
pyrimethamine  
pyrithione-zinc  
pyritinol  
pyroxamide  
quinethazone  
quinidine  
quizartinib  
R306465  
R406  
R547  
rabeprazole  
racecadotril  
raclopride  
radezolid  
RAF265  
raloxifene  
raltitrexed  
ramatroban  
ramifenazone  
ranitidine  
refametinib  
regorafenib  
remoxipride  
repaglinide  
repsox  
resatorvid  
resiquimod  
resminostat  
RG108  
RG2833  
RGFP966

rheochrysidin  
RI-1  
ribavirin  
ribitol  
ribociclib  
riboflavin  
rifampin  
rigosertib  
riluzole  
rimexolone  
riociguat  
RITA  
ritodrine  
RKI-1447  
RN-1734  
Ro-04-5595  
Ro-10-5824  
Ro-106-9920  
Ro-4987655  
Ro-90-7501  
Ro-9187  
rociletinib  
romidepsin  
roquinimex  
RS-16566  
RS-17053  
RS-504393  
RS-67506  
RU-58841  
rubitecan  
rucinol  
rutin  
ruxolitinib  
ryuvidine  
S26948  
salidroside  
salinomycin  
salvianolic-acid-B  
salvinorin-a  
sangivamycin  
SAR131675  
saracatinib  
sarafloxacin

satraplatin  
saxagliptin  
SB-200646  
SB-205384  
SB-216641  
SB-218078  
SB-218795  
SB-225002  
SB-228357  
SB-2343  
SB-239063  
SB-242235  
SB-366791  
SB-431542  
SB-505124  
SB-525334  
SB-590885  
SB-657510  
SB-743921  
SB-939  
SC-12267  
SC-144  
SCH-58261  
SCH-900776  
sclareol  
scriptaid  
SCS  
SDZ-WAG-994  
secnidazole  
securinine  
selamectin  
selinexor  
selumetinib  
semaxanib  
se-methylselenocysteine  
serdemetan  
sertindole  
sevelamer  
sevoflurane  
SGI-1027  
SGI-1776  
SIB-1757  
SID-7969543

simvastatin  
sirolimus  
skepinone-I  
SKF-96365  
SKI-II  
S-methylcysteine  
SMI-4a  
SN-38  
SNS-314  
SNX-2112  
SNX-5422  
sobetirome  
sodium-glucoheptonate  
sodium-stibogluconate  
sodium-tanshinone-ii-a-sulfonate  
sonidegib  
sorafenib  
sparfloxacin  
spermidine  
spermine  
spiradoline  
spironolactone  
SR-27897  
SR-33805  
SR-57227A  
SRT1720  
STA-5326  
stattic  
stemregenin-1  
STF-118804  
streptozotocin  
SU014813  
SU3327  
sufentanil  
sulconazole  
sulfabenzamide  
sulfamethazine  
sulfanilamide  
sulfasalazine  
sulmazole  
sunitinib  
suxibuzone  
tacalcitol

tacedinaline  
tacrolimus  
tagatose  
TAK-285  
TAK-632  
TAK-715  
TAK-733  
TAK-901  
talazoparib  
talmapimod  
taltirelin  
taltobulin  
TAME  
tamibarotene  
tamoxifen  
tanaproget  
tandutinib  
tanespimycin  
tanshinone-i  
TAS-103  
taselisib  
tasisulam  
taurine  
tazemetostat  
TC1  
tecastemizole  
tedizolid  
tedizolid-phosphate  
telatinib  
telotristat-ethyl  
temazepam  
temocapril  
temoporfin  
temozolomide  
temsirolimus  
teniposide  
tenovin-6  
tepoxalin  
teprenone  
terbutaline  
terconazole  
terfenadine  
teriflunomide

teroxirone  
tetrahydropapaverine  
tetrahydrouridine  
tetramethylthiuram-monosulfide  
tetrandrine  
tezacaftor  
TG-02  
TG100-115  
TG-100572  
TG-100713  
TG-101209  
TG-101348  
TH-302  
theophylline  
thiamine  
thiocolchicoside  
thioguanine  
thiomersal  
thiopropazine  
thiostrepton  
thiram  
thonzonium  
tiagabine  
tideglusib  
tiletamine  
tilmicosin  
tiludronate  
tioguanine  
tiotidine  
tioxolone  
tipifarnib  
tipiracil  
tipranavir  
tirapazamine  
tivantinib  
tivozanib  
TMC-353121  
TMS  
tofogliflozin  
topotecan  
torasemide  
torcetrapib  
toremifene

torin-1  
torin-2  
tosedostat  
tozasertib  
TPCA-1  
trametinib  
tranilast  
trans-4-Hydroxycrotonic-acid  
trapidil  
tremorine  
trequinsin  
triamcinolone  
triamcinolone-acetonide  
triamterene  
triapine  
trichostatin-a  
tricitabine  
trilabendazole  
trifluridine  
trimebutine  
triptolide  
trolox  
trometamol  
tropisetron  
trovafloxacin  
tryptanthrin  
TU-2100  
tucatinib  
TW-37  
TWS-119  
tyloxapol  
tyrphostin-A9  
tyrphostin-AG-1296  
tyrphostin-AG-1478  
tyrphostin-AG-494  
tyrphostin-AG-99  
U-0126  
U-18666A  
ubenimex  
UH-232-(+)  
UK-383367  
ulipristal  
UNBS-5162

UNC0631  
UNC2250  
uprosertib  
uracil  
uric-acid  
uridine  
usniacin-(+)  
valnemulin  
valrubicin  
vandetanib  
vanoxerine  
vatalanib  
VE-821  
VE-822  
vemurafenib  
venetoclax  
VER-49009  
verubulin  
vidarabine  
vinblastine  
vincamine  
vincristine  
vindesine  
vinflunine  
vinorelbine  
vismodegib  
VLX600  
volasertib  
voreloxin  
vorinostat  
voxtalisib  
VS-4718  
VTP-27999  
VU0238429  
VU0361737  
VU0364770  
VX-702  
VX-765  
warfarin  
WAY-170523  
WAY-600  
WHI-P154  
WP1066



WP1130  
WYE-125132  
WYE-354  
WZ-3146  
WZ-4002  
WZ8040  
xanomeline  
XBD173  
xilobam  
XL388  
XL-647  
XL888  
xylazine  
Y-27632  
Y-320  
Y-39983  
YM-155  
YM-201636  
YM-976  
YO-01027  
zaldaride  
zaleplon  
zardaverine  
ziprasidone  
ZK811752  
ZK-93423  
ZK-93426  
ZLN005  
ZM-306416  
ZM-447439  
zolantidine  
zolmitriptan  
ZSTK-474

---

Supplementary Table 9. List of potential therapeutic agents for LUAD patients with high-risk scores.

| Drug name  | Source | MOA (mechanism of action) | Targets ( <a href="https://pubchem.ncbi.nlm.nih.gov/">https://pubchem.ncbi.nlm.nih.gov/</a> )                                                                                                                                                                                                                                                                                                                                                   | Clinical trials in lung cancer ( <a href="https://clinicaltrials.gov/">https://clinicaltrials.gov/</a> ) | Experimental evidence in lung cancer ( <a href="https://pubmed.ncbi.nlm.nih.gov/">https://pubmed.ncbi.nlm.nih.gov/</a> ) | Drug targets mRNA Log2FC (normal and tumor) | CMap Score | Correlation Coefficient | Correlation P-value | AUC Log2FC | AUC Wilcox FDR |
|------------|--------|---------------------------|-------------------------------------------------------------------------------------------------------------------------------------------------------------------------------------------------------------------------------------------------------------------------------------------------------------------------------------------------------------------------------------------------------------------------------------------------|----------------------------------------------------------------------------------------------------------|--------------------------------------------------------------------------------------------------------------------------|---------------------------------------------|------------|-------------------------|---------------------|------------|----------------|
| paclitaxel | CTRP   | Tubulin inhibitor         | PON1, Abcb1a, UGT1A1, UGT1A4, UGT2B10, UGT2B7, UGT1A6, BATF3, CD74, CD83, CYBB, Fcgr1, H2-Aa, H2-DMa, H2-M3, H2-T23, MAP3K14, PSMB9, TNF, TUBB4A, TUBB, TUBA3C, TUBA1B, TUBA4A, TUBB4B, TUBB3, TUBB2A, TUBB8, TUBA3E, TUBA1A, TUBA1C, TUBB6, TUBB2B, TUBB1, NRG1, SRC, NFE2, NULL, EPHA5, TRIM5, MET, CYP1B1, AURKA, CYP3A5, CXCL8, NOTCH1, SLCO1B3, STMN1, BDNF, KRAS, GSTP1, ABCC1, BCL2, PIK3CG, FOS, ABCC2, NR1I2, SOD2, ABCB1, GSTM1, PGP, | Phase 4                                                                                                  | PMID: 9473739                                                                                                            | 1.043919                                    | -71.26     | -0.4274251              | 1.27E-23            | 0.47697598 | 2.02E-11       |

FASN, JAK2, E2F1,  
DSCAM, CDK2,  
ABCG2, ERCC1, ATM,  
GSTT1, NAT2,  
BRCA2, EIF4EBP1,  
MYB, PDCC4, FNTB,  
FGD4, PTEN, MMP2,  
ERBB2, SPATA5,  
TP53, MAD1L1,  
BRCA1, EGFR, LIF,  
ABCC10, CDKN1A,  
AR, SMAD4, TUBA3D,  
PIK3CA, CYP19A1,  
RRM1, TLE3, ERCC2,  
ABCC3, TOP2A,  
DDIT3, CYP3A4,  
SOX10, BIRC5,  
CASP7, CASP3,  
OPRM1, SLC29A1,  
GMNN, CDKN2A,  
PDGFRA, IL2RA,  
EDNRB, SLC01B1,  
SYK, RAF1, AKT1,  
MAP3K1, ACSS2,  
CYP3A7, CYP2C8,  
ABCB11, MAP4,  
MAPT, MAP2, Tlr4

|              |      |                   |                                                                                                                     |             |                |          |    |           |          |            |          |
|--------------|------|-------------------|---------------------------------------------------------------------------------------------------------------------|-------------|----------------|----------|----|-----------|----------|------------|----------|
| leptomycin B | CTRP | CRM1<br>inhibitor | AHR, AKT1, APAF1,<br>AR, BACH1, BAX,<br>BCL2, BCL2L1,<br>BIRC2, BIRC3, BIRC5,<br>BRCA1, BTG2,<br>CASP1, GPX1, H2AX, | Preclinical | PMID: 28942004 | 1.046014 | NA | -0.424487 | 2.73E-23 | 0.58634325 | 5.37E-10 |
|--------------|------|-------------------|---------------------------------------------------------------------------------------------------------------------|-------------|----------------|----------|----|-----------|----------|------------|----------|

CCL2, CCNB2,  
 CCND1, CCNE2,  
 CDC25A, CDC25C,  
 CDK1, CDKN1A,  
 CHEK1, CHEK2,  
 CXCL10, CXCL8,  
 CYP3A4, DNMT1,  
 E2F1, E2F3, EGFR,  
 EI24, ESR1, FGF1,  
 FOXO1, GADD45A,  
 HAX1, HK2, ID3, IL1B,  
 IL6, MAPK1, MAPK3,  
 MDM2, MDM4, MYH4,  
 NFKB1, NPPA,  
 NR4A1, NR4A2,  
 NUP62, PIDD1, PML,  
 PRC1, PRKCA,  
 PTTG1, RANBP1,  
 RELA, RPS6KB2,  
 RXRA, SESN1,  
 SMAD2, SMAD3,  
 SMAD4, SOD2,  
 STAT4, STK4, TGFA,  
 TGFB2, TNFRSF10B,  
 TNFRSF10D, TP53,  
 TP63, TXNDC5, WTIP,  
 XPO1, XPO4

|              |      |                   |              |             |    |          |    |            |          |            |          |
|--------------|------|-------------------|--------------|-------------|----|----------|----|------------|----------|------------|----------|
| nakitepiosin | CTRP | Tubulin inhibitor | TUBA4A, TUBB | Preclinical | NA | 1.076213 | NA | -0.4242508 | 2.90E-23 | 0.12312712 | 8.53E-13 |
|--------------|------|-------------------|--------------|-------------|----|----------|----|------------|----------|------------|----------|

|              |      |                                      |                                                                                                                                                                                                                                                                                                                                                                                                                                                                                                                                                                                                                                                         |         |                |          |    |            |          |            |          |
|--------------|------|--------------------------------------|---------------------------------------------------------------------------------------------------------------------------------------------------------------------------------------------------------------------------------------------------------------------------------------------------------------------------------------------------------------------------------------------------------------------------------------------------------------------------------------------------------------------------------------------------------------------------------------------------------------------------------------------------------|---------|----------------|----------|----|------------|----------|------------|----------|
| fluorouracil | CTRP | Thymidylate<br>synthase<br>inhibitor | TYMS, BAX, BBC3,<br>BBS4, BBX, BCAR3,<br>BCAS4, BCAT1,<br>BCKDHA, BCL2,<br>BCL2L1, BCL2L11,<br>BCL2L12, BDH1,<br>BDKRB2, BDNF,<br>BEAN1, BECN1,<br>BGLAP, BHLHE41,<br>BID, BIRC2, BIRC3,<br>BIRC5, BIRC6, BIRC7,<br>BLM, BLVRB, BNIP1,<br>BNIP3, BNIP3L, BOLL,<br>BOP1, BORA, BRCA1,<br>BRIX1, BTG2, BTG3,<br>BTN3A3, BUB1,<br>BUB1B, BUB3,<br>C11orf24, C14orf132,<br>C1orf35, C4BPB,<br>CA12, CA14, CABYR,<br>CAD, CALB2, CANX,<br>CAP2, CASD1,<br>CASP1, CASP10,<br>CASP2, CASP3,<br>CASP4, CASP6,<br>CASP7, CASP8,<br>CASP9, CAT, CAV1,<br>CAV2, CBR3, CBS,<br>CBX1, CCDC186,<br>CCL2, CCN1, CCN2,<br>CCN3, CCNA1,<br>CCNA2, CCNB1,<br>CCNB2, CCNC, | Phase 3 | PMID: 32331446 | 1.045272 | NA | -0.3531886 | 3.90E-16 | 0.06662838 | 1.88E-09 |
|--------------|------|--------------------------------------|---------------------------------------------------------------------------------------------------------------------------------------------------------------------------------------------------------------------------------------------------------------------------------------------------------------------------------------------------------------------------------------------------------------------------------------------------------------------------------------------------------------------------------------------------------------------------------------------------------------------------------------------------------|---------|----------------|----------|----|------------|----------|------------|----------|

CCND1, CCND2,  
CCND3, CCNE1,  
CCNE2, CCNF,  
CCNG1, CCNG2,  
CCNJL, CD24, CD274,  
CD34, CD38, CD40,  
CD40LG, CD44,  
CD52, CD63, CD8A,  
CD8B, CD9, CDA,  
CDC20, CDC25A,  
CDC25B, CDC25C,  
CDC34, CDC40,  
CDC42EP1, CDC45,  
CDC6, CDC73,  
CDCA5, CDCA7,  
CDCA8, CDH1, CDH5,  
CDH6, CDIPT, CDK1,  
CDK2, CDK5R1,  
CDKN1A, CDKN1B,  
CDKN1C, CDKN2A,  
CDKN2AIP, CDKN2C,  
CDKN3, CDX2,  
CEBPB, CENPQ,  
CENPU, CENPX,  
CEP55, CER1, CES2,  
CFLAR, CHEK1,  
CHEK2, CHI3L1,  
CHRNA4, CHST7,  
CIAO1, CIDEB,  
CITED2, CKB, CKS2,  
CLCN3, CLDN2,  
CLDN4, CLEC11A,  
CLIC1, CLTC, ctk,

COCH, COL12A1,  
COL1A1, COL1A2,  
COL2A1, COL3A1,  
COL4A2, COL5A2,  
COL6A3, COX14,  
COX5B, COX6C,  
COX7C, CP, CPA4,  
CPD, CPE, CPT1A,  
CPXM1, CRABP1,  
CRABP2, CRHBP,  
CRIM1, CRK, CRMP,  
CRYGS, CRYL1,  
CRYZ, CSE1L, CSF1,  
CSF2, CSNK1E,  
CSRP1, CST7, CST8,  
CSTF3, CTBP2,  
CTNND2, CTPS1,  
CTSB, CTSH, CTTN,  
CUL4A, CUL4B,  
CUL5, CUTC, CXCL1,  
CXCL12, CXCL2,  
DAPK1, DARS1,  
CXCL8, CXCR1,  
CXCR4, CYC1, CYCS,  
CYFIP2, CYLD,  
CYP1A1, CYP2A6,  
Cyp2b1, CYP2F1,  
CYP2S1, CYP3A4,  
CYP51A1,  
CYP51A1P2, CYTH3,  
DBF4, DBNDD2, DCC,  
DCK, DCLK1, DCT,  
DCX, DCXR, DDAH2,

DDB2, DDIT3, DDIT4,  
DDX39B, DDX4,  
DENND2C, DEPDC7,  
DES, DFFA, DHFR,  
DHX15, DIABLO,  
DICER1, DIMIT1,  
DKK1, DKK4, DLC1,  
DLG1, DLK1, DNAH2,  
DNER, DNMT3B,  
DPAGT1, DPY19L1,  
DPYD, DPYSL3,  
DRAM1, DRD5, DST,  
DTWD1, DTYMK,  
DUSP1, DUSP14,  
DUSP5, DUSP6, DUT,  
E2F1, E2F2, E2F3,  
E2F4, E2F8, EBP,  
ECHDC3, ECHS1,  
ECT2, EDIL3, EDN1,  
EDNRA, EDNRB,  
EEF1A1, FAM102A,  
EFEMP1, EFHD1,  
EFHD2, EFNB2,  
EGFR, EGR1, EHD2,  
EHF, EIF2AK3,  
EIF2B2, EIF2S1,  
EIF3H, EIF4E,  
EIF4EBP1, EIF4H,  
EIF5, EIPR1, ELMO2,  
ELN, ELOA, ELOVL5,  
EMC1, EML2, EMP3,  
ENAH, ENDOG,  
ENOSF1, ENTPD1,



ENTREP3, EOMES,  
EP300, EP400,  
EPAS1, EPB41L3,  
EPHA2, EPHX1, EPO,  
EPOR, EPPK1,  
EPRS1, EPYC, ERAS,  
ERBB2, ERBB3,  
ERBB4, ERCC1,  
ERCC2, EREG, ERN1,  
ERP29, ESPL1, ETF1,  
ETFB, ETS1, ETV2,  
EXOSC10, F12, F2,  
F3, F8, FABP7, FADD,  
FADS1, FAH,  
FAM107B, FAM114A1,  
FAM171A1, FAM20C,  
FAM234B, FAM76B,  
FANCC, FANCG,  
FANCI, FARS2, FAS,  
FasI, FASTK, FBLN1,  
FBXO5, FKBP11,  
FDXR, FEN1,  
FERMT2, FGD6,  
FGF2, FGF4, FGF5,  
FGF7, FGFR2, FGG,  
FHL2, FHL3, FIBCD1,  
FILIP1L, FKBP1B,  
FKBP5, FKBP1,  
FLRT2, FLT1, FMOD,  
FN1, FNBP1,  
FNDC3B, FOLR1,  
FOS, FOSL1, FOXA2,  
FOXC1, FOXD3,

FOXG1, FOXL2,  
FOXM1, FOXN3,  
FOXO3, FPGS,  
FTLP3, FUT1, FXYD3,  
FYN, FZD2, G0S2,  
GABRB3, GADD45A,  
GADD45B, GADD45G,  
GAL, GALNT3, GAMT,  
GAPDH, GART,  
GAST, GATA2,  
GATA4, GATA6,  
GCLM, GCSH, GDF1,  
GDF15, GDF3, GEM,  
GFAP, GFRA1,  
GINS1, GINS2, GJA1,  
GJC1, GLA, GLI1,  
GLIPR1, GNB2, GNE,  
GOLGA8A, GP1BB,  
GPR132, GPR137C,  
GPR35, GPR87, GPT,  
GPX1, GPX2, GPX4,  
GRAMD4, GRB7,  
GRHL3, GRINA,  
GSPT1, GSR, GSTA4,  
GSTM1, GSTP1,  
GSTT1, GTPBP4,  
GUCY1B1, GYG2,  
H1-3, H10, H2AX,  
H2BC12, H3-7,  
H4C14, H4C2, H4C3,  
HACD1, HAND1,  
HAND2, HAPLN2,  
HBA1, HBB, Hbb-b2,

HBE1, HBZ, HDAC1,  
HDAC2, HDAC3,  
HDAC4, HDAC7,  
HDAC9, HDGFL3,  
HERPUD1, HES1,  
Hexo 1, HGF, HHLA3,  
HIC2, HIF1A, HINT1,  
HK2, HLA-F, HLA-G,  
HM13, HMCES,  
HMG1, HMG20B,  
HMG5, HMMR,  
HMOX1, HNF1A,  
HNF4A, HNRNPA1,  
HNRNPA2B1,  
HNRNPC, HNRNPF,  
HNRNPH1, HNRNPL,  
HOXA1, HOXB3,  
HOXC11, HOXD1,  
HPX, HRAS, HS6ST2,  
HSD17B2, HSPA1B,  
HSPA2, HSPA4,  
HSPA5, HSPA8,  
HSPB1, HSPB2,  
HSPB8, HSPE1,  
HTATIP2, HTR7,  
HTRA1, IAPP, ID1,  
ID2, ID2B, ID3, IDI1,  
IER5, IFI16, IFI27L2,  
IFI35, IFI6, IFIT1,  
IFIT2, IFITM1, IFITM2,  
IFITM4P, IFNA1,  
IFNA2, IFNAR1,  
IFNAR2, IFNB1, IFNG,

IGF1, IGF1R, IGFBP2,  
IGFBP4, IGFBP5,  
IGFBP6, IHH, IKBIP,  
IKBKB, IL10, IL12B,  
IL18, IL1A, IL1B,  
IL1RN, IL27RA, IL3,  
IL6, IL7, IMPA2,  
IMPDH2, INKA2,  
INPP5E, Ins2, INSIG1,  
IQGAP2, IRAK1,  
IREB2, IRF9, Irgm1,  
ISG15, ISL1, ITGAV,  
ITGB2, ITGB4, ITPR1,  
ITSN1, JAG1, JMJD4,  
JUN, JUNB, KANSL1,  
KCNA5, KCNQ2,  
KCTD12, KDM4B,  
KDM5A, KDR, KEAP1,  
KHK, KIAA0040,  
KIF14, KIF15, KIF23,  
KIF26B, KIF2C, KIF3A,  
KIT, KITLG, KLF4,  
KLF5, KLF6, KLHL24,  
KLHL7, KLHL9,  
KLK15, KLK6, KMT2E,  
KNG1, KPNA2,  
KPNA3, KRAS, KRT1,  
KRT16, KRT17,  
KRT18, KRT5, KRT6A,  
KRT86, L1CAM,  
L1TD1, LAMA1,  
LAMB1, LAMC1,  
LARP4B, LASP1,

LCMT2, LDHA, LDHB,  
LEFTY1, LEFTY2,  
LGALS3, LGALS3BP,  
LGALS7, LGALS8,  
LGR4, LGR5, LHX1,  
LIFR, LIG1, LIMK1,  
LIMK2, LIN28A, lin-29,  
LIPH, LMF1, LMNA,  
LMNB1, LMNB2,  
LPAR6, LPO, LPXN,  
LRATD1, LRBA, LRP8,  
LSS, LXN, LY6G6C,  
LY6G6D, LYPLA1,  
M6PR, MACF1,  
MAD2L1, MAD2L2,  
MADD, MAF, MAFF,  
MAGEA12, MAGEA2,  
MAGEA4, MAGEA6,  
MAGEB2, MAGED1,  
MAGED4B, MALAT1,  
MALT1, MAMDC2,  
MAML2, MAN1A1,  
MANEA, MAP1LC3B,  
MAP2, MAP2K1,  
MAP2K2, MAP3K1,  
MAP3K20, MAP4K5,  
MAPK1, MAPK13,  
MAPK3, MAPK7,  
MAPKAP1, MAPT,  
MARCKS, MARS1,  
MAST4, MBD4,  
MBNL1, MBP,  
MCCC2, MCF2, MCL1,

MCM10, MCM2,  
MCM3, MCM4, MCM6,  
MCM7, MCMBP,  
MDFI, MDFIC, MDM2,  
MDM4, MED13L,  
MEF2B, MELK,  
MEOX1, MESP1,  
MESP2, METAP2,  
METRN, MFN1,  
MFN2, MGAT2,  
MGMT, MICA, MICB,  
MIF, MIR577, MKI67,  
MKX, MLF1, MLH1,  
MLLT11, MMP1,  
MMP2, MMP3, MMP9,  
MMS19, MNX1,  
MORF4L2, MPC2,  
MPIG6B, MPO, MPP7,  
MPRIIP, MR1, MRAS,  
MSH2, MSX2, MT1E,  
MT1M, MT1X, MTAP,  
MTHFR, MTOR,  
MTTP, MTUS1, MVP,  
MXI1, MYB, MYBL2,  
MYC, MYCL, MYCN,  
MYD88, MYF5, MYL4,  
MYL9, MYLIP,  
MYO1E, MYO6,  
MYOD1, MYOF,  
NAF1, NAIP, NANOG,  
NASP, NBL1, NBN,  
NBPF10, NCAPG,  
NCL, NCOR1,

NDUFA10, NDUFA4,  
NDUFA6, NDUFAB1,  
NDUFAF1, NDUFAF3,  
NDUFAF4, NDUFB10,  
NDUFB2, NDUFB9,  
NDUFC1, NDUFV1,  
NDUFV3, NEDD4,  
NEK1, NEK2, NEK4,  
NEK6, NEK9, NES,  
NETO2, NEUROD1,  
NEUROG2, NFE2L2,  
NFE2L3, NFIB, NFIC,  
NFKB1, NFKBIA,  
NFYA, AARS1,  
ABCB1, ABCB6,  
ABCC1, ABCC11,  
ABCC2, ABCC5,  
ABCC6, ABCG2,  
ABHD12B, ABI1, ABI2,  
ACAD9, ACADL,  
ACE2, ACKR3,  
ACOT13, ACOT7,  
ACTB, ACTC1,  
ACTG2, ACTL8,  
ACY1, ADAM10,  
ADAM3A, ADAMTS9,  
ADCY9, ADD3,  
ADGRG1, ADGRG6,  
ADGRL2, ADIRF,  
ADM, ADSS2, AFP,  
AGAP3, AGR2,  
AHNAK, AIFM1,  
AKAP12, AKR1B10,

AKR1C1, AKR1C2,  
AKR1C3, AKT1, AKT2,  
ALB, ALCAM,  
ALDH1A1, ALDH1A3,  
ALDH3A2, ALG3,  
ALKBH8, AMFR,  
AMPD2, AMT, ANG,  
ANGPT1, ANGPT2,  
ANGPTL2, ANGPTL3,  
ANGPTL4, ANKRD1,  
ANKRD11, ANKRD36,  
ANKRD36B, ANLN,  
ANP32E, ANXA1,  
ANXA2, ANXA3,  
ANXA4, AP2S1,  
AP3S1, AP4S1,  
APAF1, APBA2,  
APBB2, APEX1,  
APOB, APOBEC3C,  
APOC1, APOC3,  
AQP12B, AQP6,  
AQP9, AREG, ARF1,  
ARF3, ARFGAP1,  
ARHGDIB, ARID5B,  
ARL4C, ARL6IP5,  
ARMCX1, ARPC3,  
ASAH1, ASS1, ATF3,  
ATF4, ATF6, ATG12,  
ATOH8, ATP5F1D,  
ATP5PB, ATP5PF,  
ATP5PO, ATP6,  
ATP7B, ATP9A,  
ATXN10, AURKA,



AVEN, BAD, BAG3,  
BAK1, BARX2, NFYB,  
NINJ1, NIPSNAP2,  
NKAIN1, NKIRAS1,  
NME1, NME4,  
NODAL, NOG, NOM1,  
NOS2, NOS3,  
NOTCH1, NPM1,  
NPM3, NPPA, NQO1,  
NR1D2, NR4A1,  
NR5A2, NR6A1,  
NRG1, NRIP1, NRP1,  
NT5C1A, NT5E,  
NT5M, NTN4, NTRK2,  
NTS, NTSR1,  
NUCKS1, NUPR1,  
OAS2, ODC1,  
OGFRL1, OLFM1,  
OLIG2, OLIG3, OPTN,  
ORC3, ORC6, OTX2,  
OXCT1, P4HB,  
PAFAH1B1, PAICS,  
PAIP1, PANK1,  
PAQR8, PARD3,  
PARP1, PARP14,  
PAX3, PAX6, PBX3,  
PCDHA5, PCLAF,  
PCNA, PCOLCE2,  
PDAP1, PDCD1LG2,  
PDCD4, PDCD6IP,  
PDF, PDIA4, PDLIM5,  
PDXK, PDXP,  
PECAM1, PEG10,

PER1, PER2, PFN2,  
PGLYRP1, PGR,  
PHIP, PHLDA3,  
PHYH, PI4KB, PIR,  
PISD, PLA2G4A,  
PLAT, PLAU, PLCG1,  
PLEKHB1, PLEKHO1,  
PLIN2, PLIN3, plk,  
PLK1, PLK2, PLK3,  
PLOD2, PLP2,  
PLRG1, PLSCR1,  
PMAIP1, PMF1,  
PMS2P4, PNMA2,  
PNP, PNPLA6,  
PNRC1, PODXL,  
POLA1, POLA2,  
POLE2, POLG,  
POSTN, POU5F1,  
PPA2, PPARG,  
PPFIBP1, PPIE,  
PPM1D, PPP1CA,  
PPP1CC, PPP1R15A,  
PPP1R17, PPP1R1B,  
PPP1R2, PPP2CB,  
PPP3CA, PRC1,  
PRDM14, PREPL,  
PRIM1, PRKAG2,  
PRKCI, PRKCZ,  
PRKDC, PRNP,  
PROC, PROCR,  
PRODH2, PROM1,  
PRPF18, PRPS1,  
PRPS2, PRR13,

PRRG1, PRRX1,  
PRSS2, PSG9,  
PSMB10, PSMC3IP,  
PSRC1, PTCH1,  
PTEN, PTGR1, PURA,  
PURG, PTGS2, PTK2,  
PTPRK, PTTG1,  
PTTG3P, PUM1,  
PVT1, PWP2, PXMP2,  
QSOX1, R3HDM2,  
RAB11A, RAB20,  
RAB21, RAB25,  
RAB8A, RAD23B,  
RAD51C, RAD54B,  
RAF1, RAMP1,  
RANBP1, RARRES2,  
RAX2, RB1, RBBP4,  
RBM14, RBM5, RBP1,  
RBPJ, RCBTB2,  
RCC1, RDX, RECQL4,  
REG4, RELA, REPS1,  
REST, REV1, RFC2,  
RFC3, RFC4, RGS1,  
RGS13, RGS16,  
RGS2, RGS4, RGS5,  
RHBDL2, RHOA,  
RIPK1, RIT1,  
RNASE4, RND2,  
RNF34, RNF4,  
RPL10A, RPL21P4,  
RPL23, RPL23AP1,  
RPL24, RPL3, RPL37,  
RPL6, RPRD1B,

RPS26, RPS27L,  
RPS28, RRAS,  
RRBP1, RRM1,  
RRM2, RRM2B,  
RRP15, RSRC2,  
RTKN, RTL8C,  
RUNX2, S100A10,  
S100A11, S100A2,  
S100A3, S100A4,  
S100P, SAA1, sah,  
SAMHD1, SAP30,  
SAT1, SCAMP3,  
SCCPDH, SCD,  
SCG2, SCN2B,  
SCNN1A, SCNN1B,  
SCUBE2, SDCCAG8,  
SDHA, SDHD,  
SEC14L1, SEC23A,  
SEC31A, SEC31B,  
SELENOP, SEMA3A,  
SEPHS1, SEPHS2,  
SEPTIN9, SERF2,  
SERPINA5,  
SERPINA7,  
SERPINB2,  
SERPINB4,  
SERPINB5,  
SERPIND1,  
SERPINE2, SERPINI1,  
SERTAD1, SESN1,  
SESN2, SET, SETD5,  
SEZ6L, SF3B3, SFN,  
SFRP2, SGCE, SHH,

SHISA9, SHMT2,  
SIGLEC1, SIGLEC9,  
SKIC8, SLC13A5,  
SLC15A1, SLC16A1,  
SLC16A6, SLC22A7,  
SLC22A8, SLC25A23,  
SLC25A27, SLC29A1,  
SLC2A1, SLC2A14,  
SLC2A2, SLC2A3,  
SLC35F5, SLC3A2,  
SLC47A1, SLC48A1,  
SLC5A1, SLC9A3,  
SLCO2A1, SMAD4,  
SMARCA1, SMCHD1,  
SMIM10L2A, SMIM14,  
SMN2, SMO, SMOX,  
SMS, SMURF1,  
SNAI2, SNAP29,  
SNAPC1, SNHG15,  
SNORD22, SNRNP48,  
SNRPA1, SNTB1,  
SNX6, SOAT1,  
SOCS1, SOD1, SOD2,  
SOX17, SOX18,  
SOX2, SOX4, SP1,  
SP3, SPAG5,  
SPANXA1, SPANXC,  
SPARC, SPATA25,  
SPINK4, SPN,  
SPOCK1, SPON1,  
SPRR1A, SPRR1B,  
SPRR3, SPRY1,  
SPTAN1, SQLE, SRC,

SREBF1, SREBF2,  
SRI, SRP19, SRP72,  
SRP9, SRRM1,  
SRSF11, SRSF6, SST,  
STARD7, STAT1,  
STAT3, STAU1,  
STBD1, STK38, STK4,  
STOM, STX5,  
STXBP4, SUFU,  
SUPV3L1, su(r),  
SWAP70, SYCP3,  
SYMPK, SYNCRIP,  
SYP, SYTL2, T, TAF3,  
TAF5L, TAGLN,  
TANK, TAOK3, TAP1,  
TAP2, TAT, TAX1BP3,  
TBCD, TBCE, TBRG4,  
TCF15, TCF19, TCF3,  
TCF7L2, TDGF1, TEK,  
TERF2, TERT,  
TFCP2L1, TFDP1,  
TFF1, TFPI, TFRC,  
TGFA, TGFB1,  
TGFB2, TGFB1,  
TGFBR3, TH, THBS1,  
THNSL2, THOC1,  
THSD7A, TIAL1,  
TIGAR, TIMELESS,  
TIMP3, TINF2, TJP3,  
TK1, TK2, TLR3,  
TLR4, TLR9,  
TMEM150C,  
TMEM184B,

TMEM187, TMEM33,  
TMEM40, TMEM74,  
TMEM9B, TMSB10,  
TMSB15A, TMSB4X,  
TMSB4XP6, TNF,  
TNFAIP3,  
TNFRSF10A,  
TNFRSF10B,  
TNFRSF10C,  
TNFRSF10D,  
TNFRSF11B,  
TNFRSF18,  
TNFRSF19,  
TNFRSF1A,  
TNFRSF1B, TNFSF10,  
TNFSF13, TNNI1,  
TNNI3, TNNT1, TNS3,  
TOB1, TOP1, TOP2A,  
TOPBP1, TP53,  
TP53AIP1, TP53I3,  
TP53INP1, TP73,  
TPI1, TPM1, TPMT,  
TPP1, TPP2, TPST2,  
TPT1, TRADD,  
TRAF2, TRAP1,  
TRIAP1, TRIB2,  
TRIB3, TRIM2,  
TRIOBP, TROAP,  
Trp53, TSC2, TSHB,  
TSHZ1, TSPAN8,  
TSPO, TSR1, TST,  
TTYH2, TUBA4B,  
TUBA8, TUBB,

TUBB2A, TUBB3,  
TUBB4B, TUBD1,  
TXNIP, TXNRD1,  
TXNRD3, TYMP,  
TYRP1, U2SURP,  
UBE2C, UBE2S,  
UBE2T, UCHL1,  
UCK2, UCP2, UGDH,  
UGT1A1, UGT8,  
UMPS, UNC13B,  
UNC5B, UNG, ung-1,  
UPP1, UPRT,  
UQCR10, UQCR11,  
UQCRB, UQCRC2,  
UQCRFS1, UQCRH,  
UROD, USH2A,  
USP14, USP9X,  
UTP3, UXT, VANGL2,  
VASP, VAT1, VAV3,  
VCL, VEGFA, VGF,  
VIM, VPREB3, VPS35,  
VPS37A, VPS52,  
WARS1, WBP4,  
WDR4, WEE1, WNT3,  
WNT5A, WNT8A,  
WT1, WTAP, XAF1,  
XAGE1B, XBP1, XIAP,  
XIST, XRCC1,  
XRCC3, XRCC5,  
XRCC6, YARS1,  
YARS2, YBX1, YES1,  
YIF1A, YWHAB,  
YWHAE, YWHAH,



ZBTB18, ZBTB20,  
ZBTB7A, ZC3H3,  
ZCCHC18, ZDHHC9,  
ZFP42, Zfp518a, ZIM2,  
ZKSCAN3, ZMAT3,  
ZMYND8, ZNF263,  
ZNF266, ZNF282,  
ZNF32, ZNF367,  
ZNF408, ZNF473,  
ZNF532, ZNF552,  
ZNF582, ZRSR2,  
ZSCAN18, PARD3B,  
IRS1, MEGF11, IL11,  
ALDH3A1, CYP1B1,  
ITGAL, CHN2, GNAS,  
TMEM167A, XRCC4,  
SLC22A16, CYP19A1,  
CCNK, KLC1, FGFR4,  
MIR27A, PTPRC,  
PON1, CBLB, DLG5,  
IL6R, NOS1, ATM,  
CBR1, PPP2R5D,  
SELE, ABCC4, PERP,  
DPYS, PIK3CA,  
WNT5B, MET,  
SHMT1, FOXO1,  
CYP2C8, INSR,  
SLC19A1, BRAF,  
CYP2C19, MUC2,  
REV3L, RBX1, EXO1,  
ABCG1, IGFBP3,  
APC, PIK3R2, IL2RA,  
CYP2E1, SLCO1B1,

GNL3, GALNT14,  
UPP2, PPAT,  
CYP1A2, CYP2C9,  
ABCC3, ATAD5,  
NR1H4, CDC21

|           |      |               |                                                                                                     |             |                |          |    |            |          |            |          |
|-----------|------|---------------|-----------------------------------------------------------------------------------------------------|-------------|----------------|----------|----|------------|----------|------------|----------|
| SB-743921 | CTRP | KSP inhibitor | KIF11                                                                                               | Preclinical | PMID: 23394180 | 1.260722 | NA | -0.3475159 | 1.22E-15 | 0.41608951 | 3.56E-08 |
| 3-CI-AHPC | CTRP | AKT inhibitor | BCL2L1, BIRC2,<br>CHUK, FAS,<br>HSP90AB1, NFKBIA,<br>RALBP1, RELA,<br>TNFRSF10A,<br>TNFRSF10B, XIAP | Preclinical | NA             | 1.028049 | NA | -0.3418504 | 3.75E-15 | 0.10593642 | 1.35E-10 |

|              |       |                       |                                                                                                                                                                                                                  |             |                |           |        |            |          |            |          |
|--------------|-------|-----------------------|------------------------------------------------------------------------------------------------------------------------------------------------------------------------------------------------------------------|-------------|----------------|-----------|--------|------------|----------|------------|----------|
| STF-31       | CTRP  | GLUT1 inhibitor       | SLC2A4, CYP19A1, HSD3B1                                                                                                                                                                                          | Preclinical | NA             | 1.069723  | NA     | -0.3133482 | 7.47E-13 | 0.12603485 | 2.81E-08 |
| parbendazole | CTRP  | Tubulin inhibitor     | NR1H4, AR, GMNN, CYP1A2                                                                                                                                                                                          | Preclinical | NA             | 0.8428409 | -91.12 | -0.3089235 | 1.62E-12 | 0.14344103 | 1.91E-07 |
| cabazitaxel  | PRISM | Microtubule inhibitor | AKT1S1, FOXO3, TUBB4A, TUBB, TUBA3C, TUBA1B, TUBA4A, TUBB4B, TUBB3, TUBB2A, TUBB8, TUBA3E, TUBA1A, TUBA1C, TUBB6, TUBB2B, TUBB1, TUB, IGF2, CYP3A4, NULL, TUBA3D, CYP3A5, CYP2C8, ABCB1, ABCG2, SLCO1B1, SLCO1B3 | Phase 2     | PMID: 27572899 | 1.061563  | NA     | -0.5380321 | 7.29E-39 | 0.3482832  | 2.42E-15 |
| epothilone-b | PRISM | Microtubule inhibitor | CALCA, NGF, TUBB4A, TUBB, TUBA3C, TUBA1B, TUBA4A, TUBB4B, TUBB3, TUBB2A, TUBB8, TUBA3E, TUBA1A, TUBA1C, TUBB6, TUBB2B, TUBB1, CYP3A4, TUBA8                                                                      | Phase 2     | PMID: 21738778 | 1.103772  | -97.63 | -0.5094874 | 2.21E-34 | 0.3210276  | 1.92E-14 |
| vincristine  | PRISM | Tubulin inhibitor     | AR, TYMS, TUBA1A, SRI, TUBB2A, ABL1, CAPG, CXCL12, TUBB4B, NRG1, DROSHA, TUBB3,                                                                                                                                  | Phase 3     | PMID: 28988243 | 1.05251   | -38.68 | -0.3790285 | 1.58E-18 | 0.4474621  | 1.23E-10 |

ATRX, PIK3CA,  
 PIK3CG, TUBA1B,  
 TUBA4A, CP, ABCB4,  
 VWF, SMAD3, NTF3,  
 AFP, ABCC3,  
 CYP3A5, NR1I2,  
 LINC00251, TUBB8,  
 BMP7, TUBB, DOK5,  
 TUBB4A, GATA3,  
 TUBB6, FGF2,  
 TUBB1, BDNF,  
 ABCC1, RALBP1,  
 TUBA3E, CDKN1B,  
 GMNN, ODC1,  
 TUBA1C, BCR,  
 MYCN, TUBA3C,  
 PNPLA3, TUBA3D,  
 TOP2A, NULL,  
 ABCC2, CEP72,  
 ABCC10, BCL2,  
 TUBB2B, ACTG1,  
 ABCB1, GSTA1,  
 SLC22A3, ABCB11,  
 ABCG2, SLC01B1,  
 SLC01B3, CYP3A4,  
 CYP3A7

|             |       |                                           |                                                                                                                                       |         |                |          |        |            |          |           |          |
|-------------|-------|-------------------------------------------|---------------------------------------------------------------------------------------------------------------------------------------|---------|----------------|----------|--------|------------|----------|-----------|----------|
| gemcitabine | PRISM | Ribonucleoti<br>de reductase<br>inhibitor | XYLT2, SLC28A1,<br>SMAD4, PTEN, IGF2,<br>SERPINC1, ERBB2,<br>GPX5, DAPK1,<br>DOCK8, NT5C2, CBL,<br>KLC3, TNF, CYP2C8,<br>FANCC, RRM2, | Phase 4 | PMID: 29949158 | 1.057902 | -99.12 | -0.3522404 | 4.73E-16 | 0.5379188 | 1.35E-10 |
|-------------|-------|-------------------------------------------|---------------------------------------------------------------------------------------------------------------------------------------|---------|----------------|----------|--------|------------|----------|-----------|----------|

RRM1, TENT4A, KDR,  
 PPP1R13L, RRM2B,  
 ERCC2, AKT1, TGM2,  
 DCK, BRCA1, SH2D5,  
 BRCA2, EGFR, SRC,  
 ABCG2, KRAS,  
 ERCC1, MSH5,  
 PPP1R18, IDH1,  
 ATAT1, FHL2, FKBP5,  
 CDA, PRRC2A,  
 POLR1G, SLC29A3,  
 NT5C1A, CDKN2A,  
 HLA-C, POLR2A,  
 NT5C3A, CMPK1,  
 SLC28A3, NRG1,  
 ETS2, CDSN,  
 SLC28A2, ACSS2,  
 HRAS, NT5C, NRAS,  
 CHEK1, MUCL3,  
 PIK3CA, HCP5,  
 SLC29A1, TP53,  
 CIP2A, SERPINA5,  
 ATRX, RAF1,  
 PSORS1C1, WEE1,  
 ESR2, DCTD, ALG10,  
 CASP7, C6orf15,  
 PPCDC, XRCC1,  
 FGFR3, CDC5L,  
 SLC29A2, TK2, TYMS,  
 NME1, ABCB1,  
 ABCC10

|          |       |                         |                                        |             |    |        |    |            |          |           |          |
|----------|-------|-------------------------|----------------------------------------|-------------|----|--------|----|------------|----------|-----------|----------|
| SGI-1776 | PRISM | PIM Kinase<br>Inhibitor | PIM1, PIM3, PIM2,<br>FLT3, YES1, JAK2, | Preclinical | NA | 1.0477 | NA | -0.3269775 | 6.37E-14 | 0.3311275 | 1.45E-09 |
|----------|-------|-------------------------|----------------------------------------|-------------|----|--------|----|------------|----------|-----------|----------|

|               |       |                       |                                                                                                                                                      |             |                |          |    |            |          |           |          |
|---------------|-------|-----------------------|------------------------------------------------------------------------------------------------------------------------------------------------------|-------------|----------------|----------|----|------------|----------|-----------|----------|
| dolastatin-10 | PRISM | Microtubule inhibitor | HASPIN<br>TUBB4A, TUBB,<br>TUBA3C, TUBA1B,<br>TUBA4A, TUBB4B,<br>TUBB3, TUBB2A,<br>TUBB8, TUBA3E,<br>TUBA1A, TUBA1C,<br>TUBB6, TUBB2B,<br>TUBB1, TUB | Preclinical | PMID: 10321512 | 1.083865 | NA | -0.3237382 | 1.16E-13 | 0.3295997 | 1.28E-09 |
| echinomycin   | PRISM | HIF1 Inhibitor        | HIF1A, VEGFA                                                                                                                                         | Preclinical | PMID: 33572152 | 1.049149 | NA | -0.318722  | 2.87E-13 | 0.3816931 | 1.81E-08 |
| MPI-047960    | PRISM | MPS1 inhibitor        | TTK                                                                                                                                                  | Preclinical | NA             | 1.372288 | NA | -0.3003071 | 7.02E-12 | 0.3255934 | 5.25E-08 |

---
